# Supplementary material for: Techno-economic analysis and life cycle assessment of mixed plastic waste gasification for production of methanol and hydrogen
Source: Royal Society of Chemistry journal article supplement (doi:10.1039/d3gc00679d), 2023-01-01
Supplement: d3gc00679d1.pdf [file d3gc00679d1.pdf]

## Electronic Supplementary Information

### Techno-economic analysis and life cycle assessment of mixed plastic waste gasification for production of methanol and hydrogen

Shaik Afzal,<sup>a,b</sup> Avantika Singh,<sup>a,b,\*</sup> Scott R. Nicholson,<sup>b,c</sup> Taylor Uekert,<sup>b,d</sup> Jason S. DesVeaux,<sup>a,b</sup> Eric C.D. Tan,<sup>a</sup> Abhijit Dutta,<sup>a</sup> Alberta C. Carpenter,<sup>b,d</sup> Robert M. Baldwin,<sup>b</sup> and Gregg T. Beckham<sup>b,c,\*</sup>

a. Catalytic Carbon Transformation and Scale-Up Center, National Renewable Energy Laboratory, Golden CO, 80401 USA

b. BOTTLE Consortium, Golden CO, 80401 USA

c. Renewable Resources and Enabling Sciences Center, National Renewable Energy Laboratory, Golden CO, 80401 USA

d. Strategic Energy Analysis Center, National Renewable Energy Laboratory, Golden CO, 80401 USA

\* Email: [gregg.beckham@nrel.gov](mailto:gregg.beckham@nrel.gov); [avantika.nrel@outlook.com](mailto:avantika.nrel@outlook.com)

*gasification | mixed plastic waste | methanol | hydrogen | TEA | LCA | municipal solid waste*

|                                                                                                    |    |
|----------------------------------------------------------------------------------------------------|----|
| <b>S1. Supporting Figures</b>                                                                      | 3  |
| <b>Fig. S1.</b> CAPEX and OPEX breakdown for MSW-Methanol process                                  | 3  |
| <b>Fig. S2.</b> Methanol MSP breakdown by process area for MPW-Methanol process                    | 3  |
| <b>Fig. S3.</b> Methanol MSP breakdown for MSW-Methanol process                                    | 4  |
| <b>Fig. S4.</b> Sensitivity analysis for MSW-Methanol process                                      | 4  |
| <b>Fig. S5.</b> CAPEX and OPEX breakdown for MSW-Hydrogen process                                  | 5  |
| <b>Fig. S6.</b> Hydrogen MSP breakdown by process area for MPW-Hydrogen process                    | 5  |
| <b>Fig. S7.</b> Hydrogen MSP breakdown for MSW-Hydrogen process                                    | 6  |
| <b>Fig. S8.</b> Sensitivity analysis for MSW-Hydrogen process                                      | 6  |
| <b>Fig. S9.</b> Sankey diagram for carbon balance in the MSW-Methanol process                      | 7  |
| <b>Fig. S10.</b> Sankey diagram for carbon balance in the MPW-Methanol process                     | 7  |
| <b>Fig. S11.</b> Steam system for MPW-Methanol process                                             | 8  |
| <b>Fig. S12.</b> Downstream processing of syngas remains the same irrespective of feedstock        | 8  |
| <b>S2. Supporting Tables</b>                                                                       | 9  |
| <b>Table S1.</b> Mass balance around MPW gasifier                                                  | 9  |
| <b>Table S2.</b> Operating cost data                                                               | 9  |
| <b>Table S3.</b> CAPEX breakdown by process sections for MPW-Methanol process                      | 10 |
| <b>Table S4.</b> OPEX breakdown for MPW-Methanol process                                           | 11 |
| <b>Table S5.</b> MSP breakdown for MPW-Methanol process                                            | 12 |
| <b>Table S6.</b> Reasoning for choice of bounds for sensitivity analysis for MPW-Methanol process  | 13 |
| <b>Table S7.</b> Mass balance around MSW gasifier                                                  | 14 |
| <b>Table S8.</b> CAPEX breakdown by process sections for MSW-Methanol process                      | 14 |
| <b>Table S9.</b> OPEX breakdown for MSW-Methanol process                                           | 15 |
| <b>Table S10.</b> MSP breakdown for MSW-Methanol process                                           | 17 |
| <b>Table S11.</b> Reasoning for choice of bounds for sensitivity analysis for MSW-Methanol process | 17 |
| <b>Table S12.</b> CAPEX breakdown by process sections for MPW-Hydrogen process                     | 18 |
| <b>Table S13.</b> OPEX breakdown for MPW-Hydrogen process                                          | 19 |

|                                                                                                                          |    |
|--------------------------------------------------------------------------------------------------------------------------|----|
| <b>Table S14.</b> MSP breakdown for MPW-Hydrogen process .....                                                           | 20 |
| <b>Table S15.</b> CAPEX breakdown by process sections for MSW-Hydrogen process .....                                     | 20 |
| <b>Table S16.</b> OPEX breakdown for MSW-Hydrogen process .....                                                          | 21 |
| <b>Table S17.</b> MSP breakdown for MSW-Hydrogen process .....                                                           | 22 |
| <b>Table S18.</b> Material Flows through Industry (MFI) analysis results for MPW-Methanol and MSW-Methanol cases .....   | 23 |
| <b>Table S19.</b> Material Flows through Industry (MFI) analysis results for MPW-Hydrogen and MSW-Hydrogen cases .....   | 23 |
| <b>Table S20.</b> LCA results for MPW-Methanol and MPW-Hydrogen processes compared to their fossil-fuel counterparts ... | 24 |
| <b>Table S21.</b> Heat duties of all major heat transfer equipment .....                                                 | 25 |
| <b>S3. MPW-Methanol process</b> .....                                                                                    | 26 |
| <b>Fig. S13.</b> Gasification and gas clean-up PFD for MPW-Methanol process .....                                        | 26 |
| <b>Table S22.</b> Energy balance for gasification reactor .....                                                          | 28 |
| <b>Fig. S14.</b> Syngas preparation PFD for MPW-Methanol process .....                                                   | 29 |
| <b>Fig. S15.</b> Methanol synthesis loop PFD for MPW-Methanol process .....                                              | 30 |
| <b>Fig. S16.</b> Effect of purge split fraction on import natural gas .....                                              | 31 |
| <b>Fig. S17.</b> Methanol distillation PFD for MPW-Methanol process .....                                                | 32 |
| <b>Table S23.</b> Stream summary for MPW-Methanol process .....                                                          | 34 |
| <b>Table S24.</b> Stream summary for MPW-Methanol process (contd.) .....                                                 | 35 |
| <b>S4. MSW-Methanol process</b> .....                                                                                    | 36 |
| <b>Fig. S18.</b> Gasification and gas clean-up for MSW-Methanol process .....                                            | 36 |
| <b>Fig. S19.</b> Syngas preparation PFD for MSW-Methanol process .....                                                   | 37 |
| <b>Fig. S20.</b> Methanol synthesis PFD for MSW-Methanol process .....                                                   | 37 |
| <b>Fig. S21.</b> Methanol distillation PFD for MSW-Methanol process .....                                                | 38 |
| <b>Fig. S22.</b> Fuel-gas system for MSW-Methanol process .....                                                          | 38 |
| <b>Table S25.</b> Stream summary of MSW-Methanol process .....                                                           | 39 |
| <b>Table S26.</b> Stream summary of MSW-Methanol process (contd.) .....                                                  | 40 |
| <b>S5. MPW-Hydrogen process</b> .....                                                                                    | 42 |
| <b>Fig. S23.</b> WGS PFD for MPW-Hydrogen process .....                                                                  | 42 |
| <b>Fig. S24.</b> PSA PFD for MPW-Hydrogen process .....                                                                  | 43 |
| <b>Table S27.</b> Stream summary of MPW-Hydrogen process .....                                                           | 43 |
| <b>S6. MSW-Hydrogen process</b> .....                                                                                    | 44 |
| <b>Fig. S25.</b> WGS PFD for MSW-Hydrogen process .....                                                                  | 44 |
| <b>Fig. S26.</b> PSA PFD for MSW-Hydrogen process .....                                                                  | 45 |
| <b>Table S28.</b> Stream summary of MSW-Hydrogen process .....                                                           | 45 |
| <b>References</b> .....                                                                                                  | 46 |

## S1. Supporting Figures

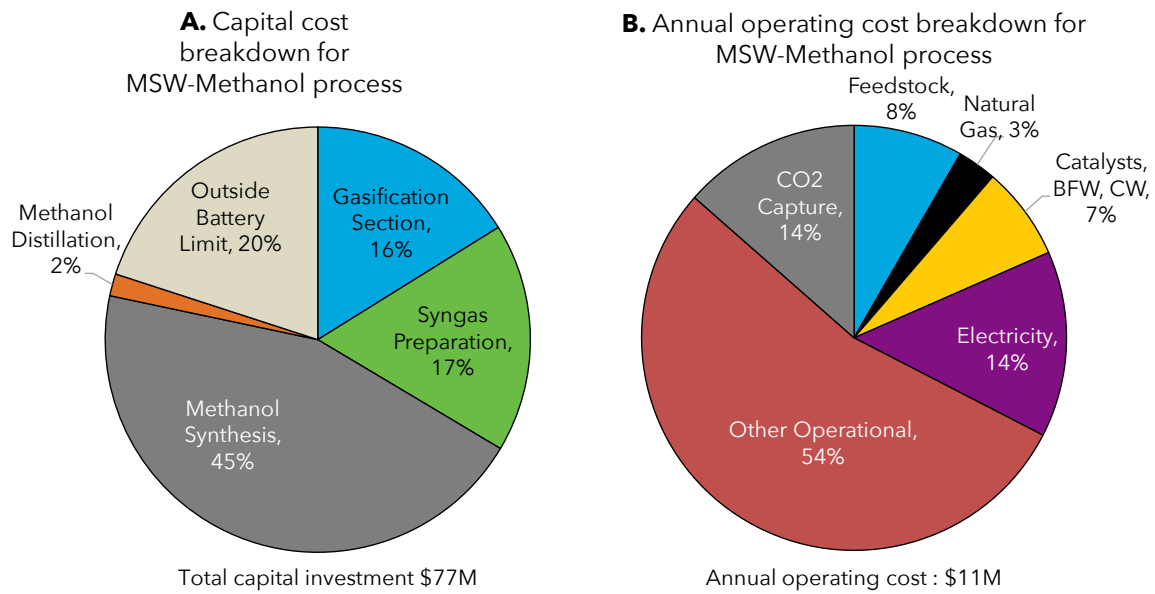

**Fig. S1.** CAPEX and OPEX breakdown for MSW-Methanol process

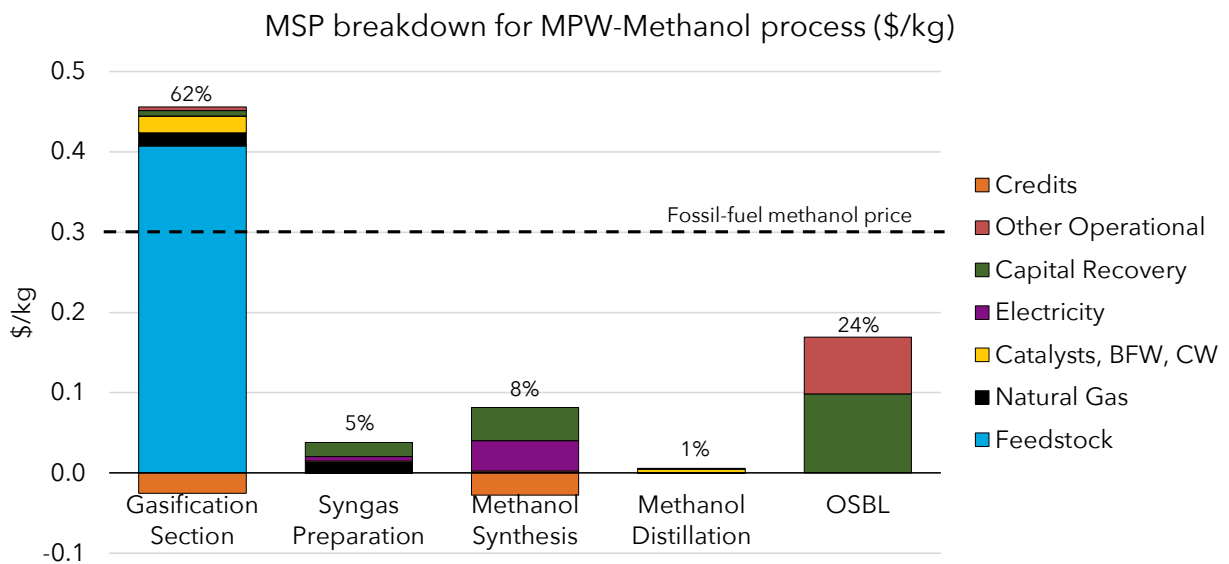

**Fig. S2.** Methanol MSP breakdown by process area for MPW-Methanol process

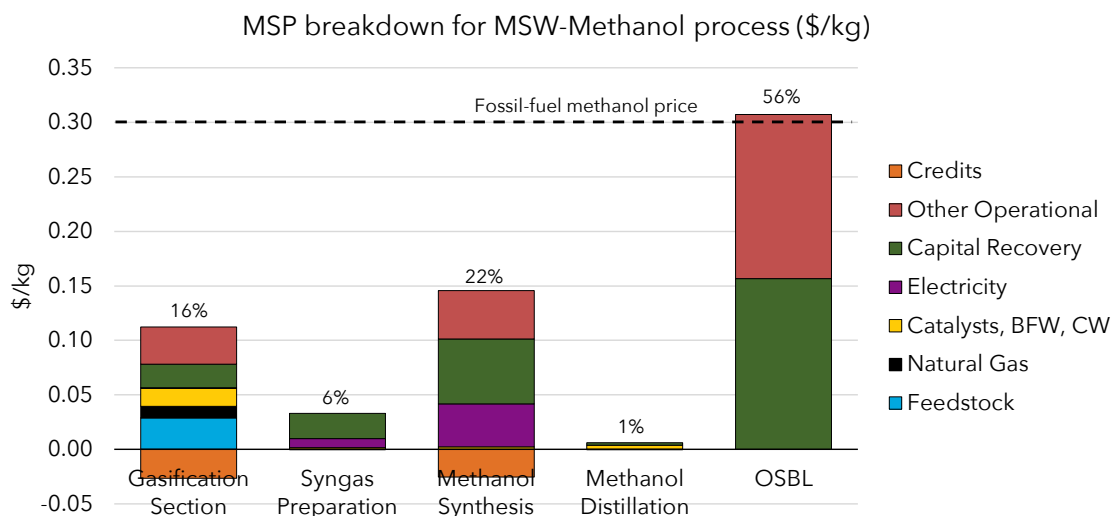

**Fig. S3.** Methanol MSP breakdown for MSW-Methanol process

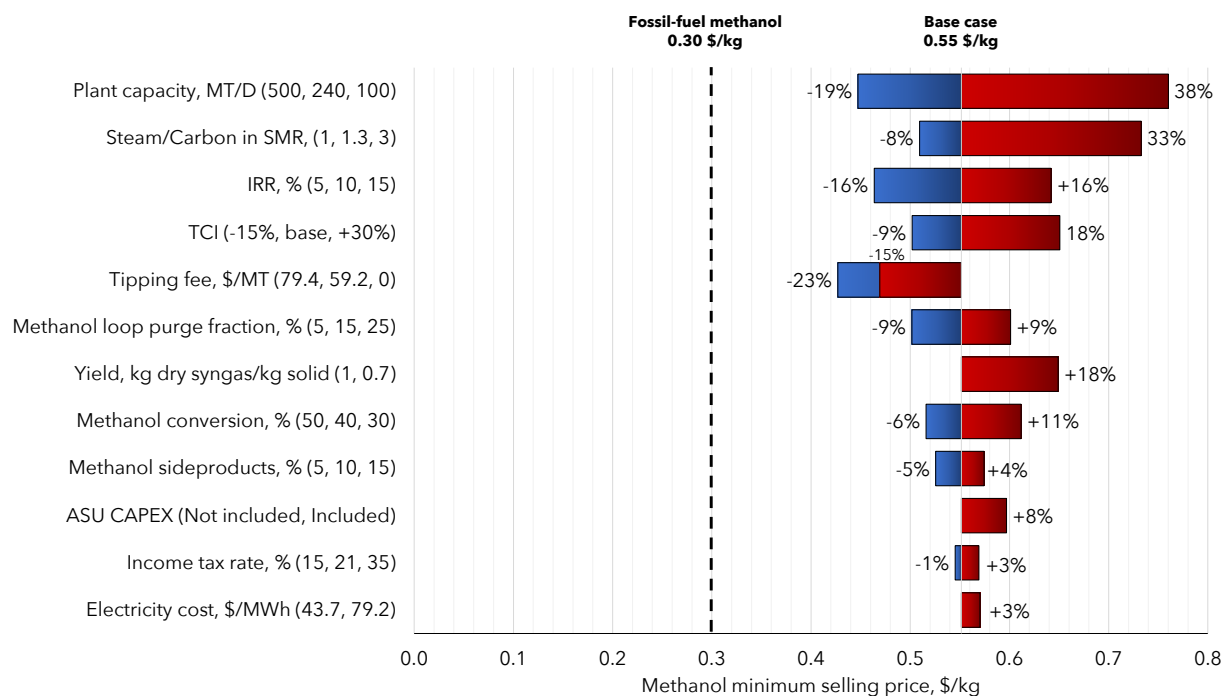

**Fig. S4.** Sensitivity analysis for MSW-Methanol process. Economies of scale effect is more apparent in MSW-Methanol process. Considering a credit based on the US average tipping fee of \$59/MT, the methanol MSP is \$0.49/kg. Discussion on these results is included in section **S4**.

**A. Capital cost breakdown for MSW-Hydrogen process**

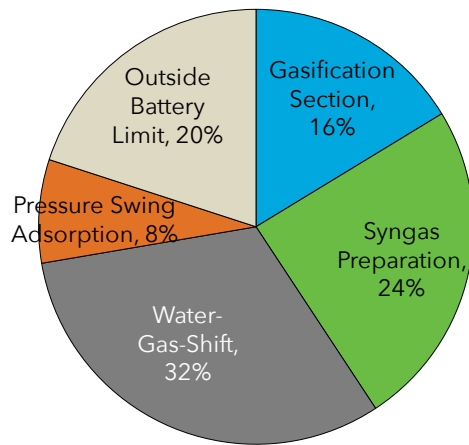

Total capital investment \$93M

**B. Annual operating cost breakdown for MSW-Hydrogen process**

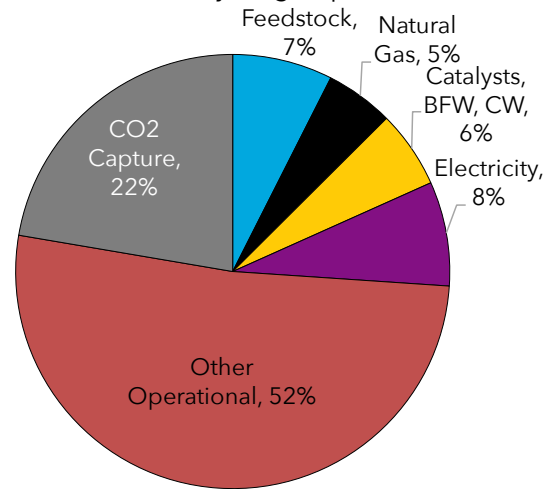

Annual operating cost \$12M

**Fig. S5. CAPEX and OPEX breakdown for MSW-Hydrogen process**

MSP breakdown for MPW-Hydrogen process (\$/kg)

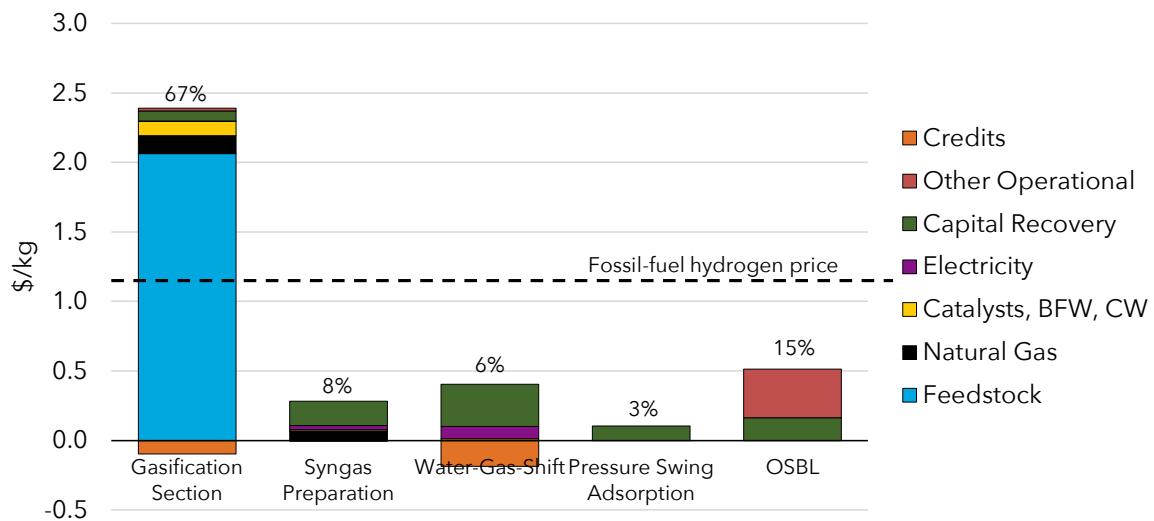

**Fig. S6. Hydrogen MSP breakdown by process area for MPW-Hydrogen process**

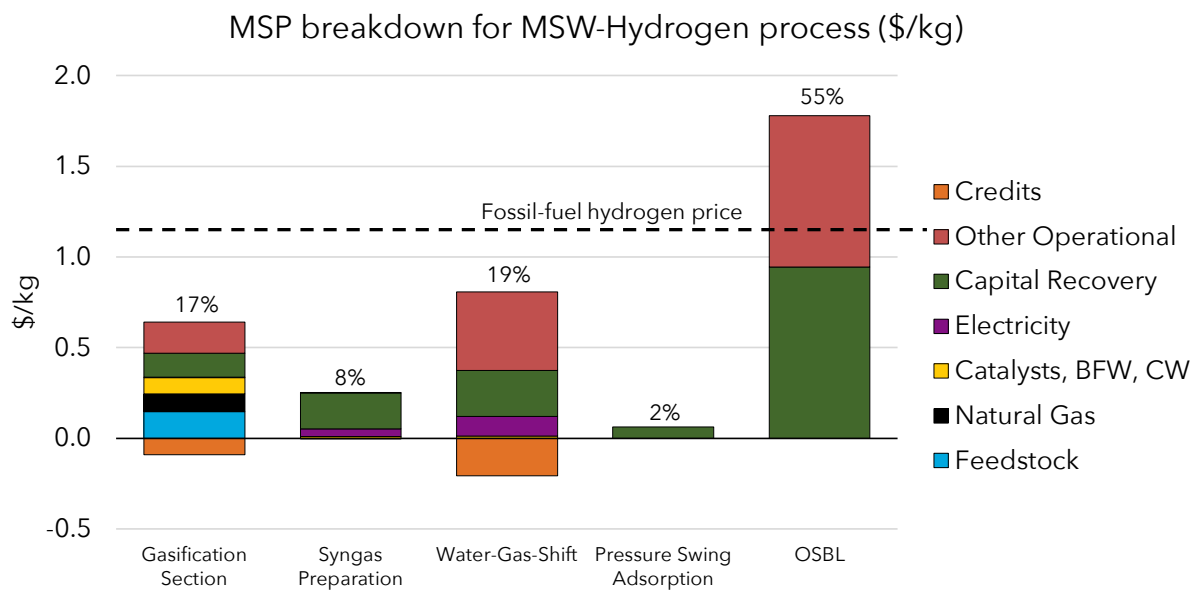

**Fig. S7.** Hydrogen MSP breakdown for MSW-Hydrogen process

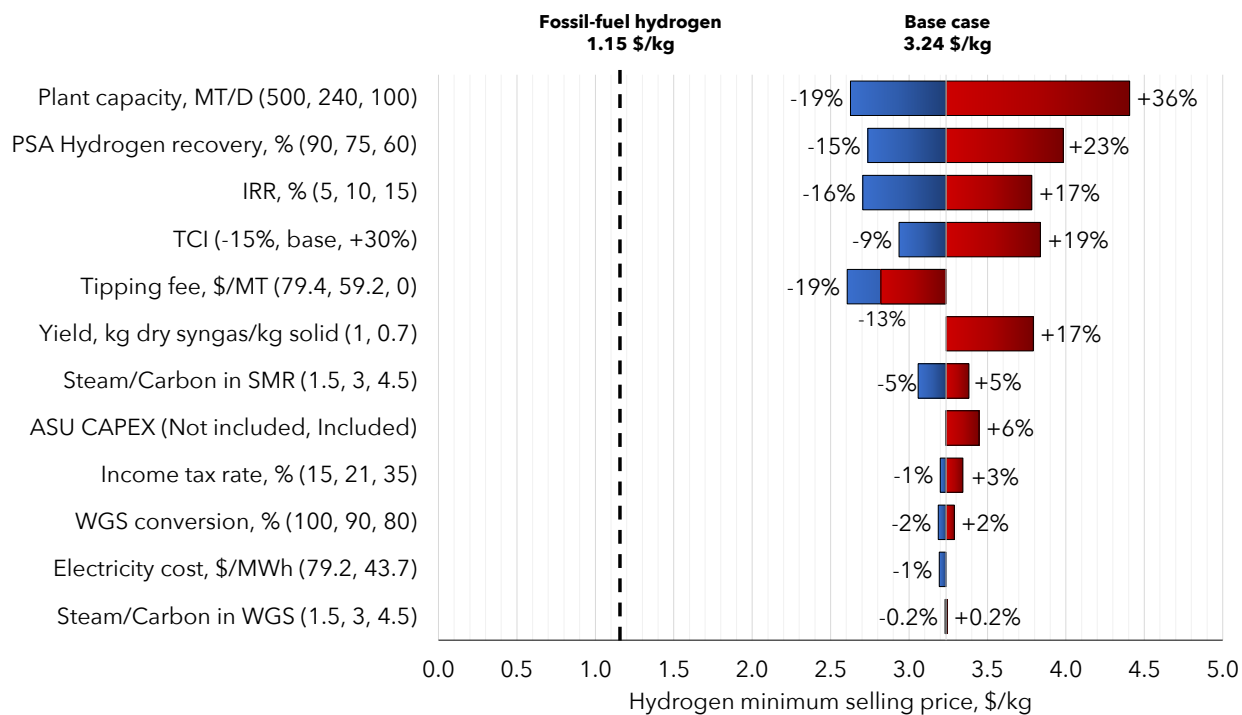

**Fig. S8.** Sensitivity analysis for MSW-Hydrogen process. Plant capacity and PSA Hydrogen recovery efficiency have largest impact on hydrogen MSP.

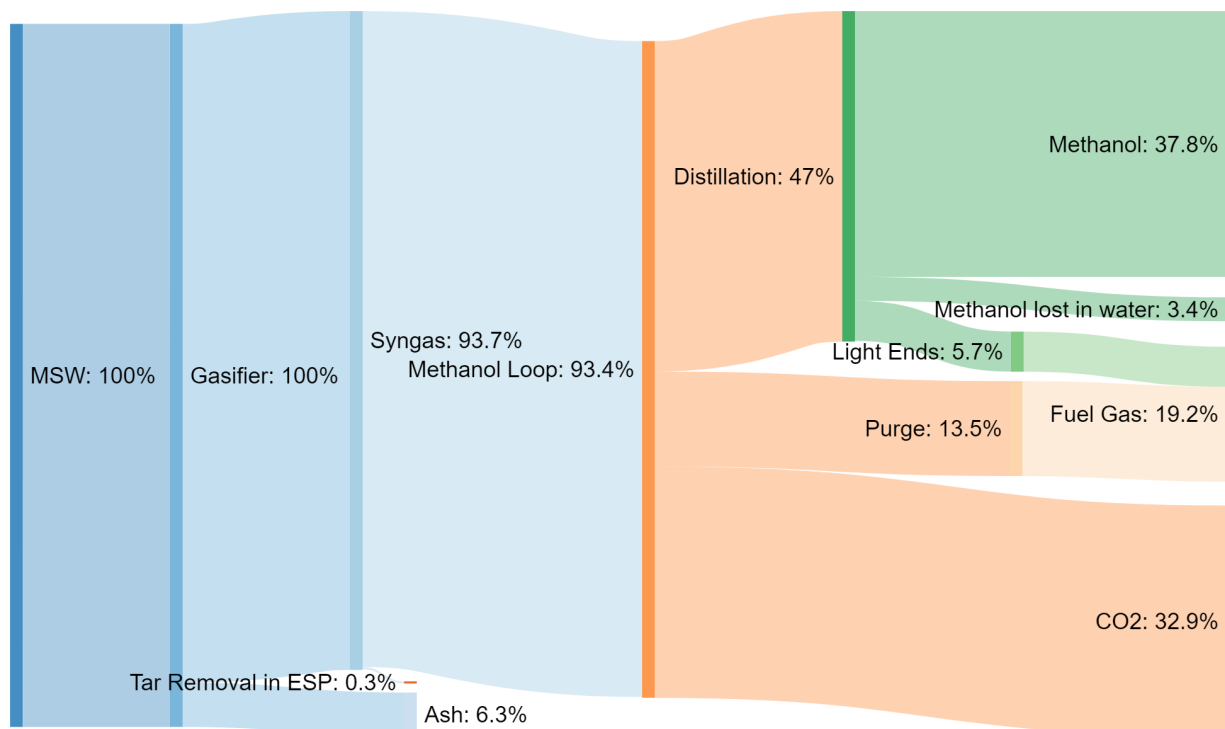

**Fig. S9.** Sankey diagram for carbon balance in the MSW-Methanol process. The carbon efficiency is low (37.8%), mainly due to loss of carbon as CO<sub>2</sub> from the gasifier which is removed in CO<sub>2</sub> removal prior to methanol synthesis.

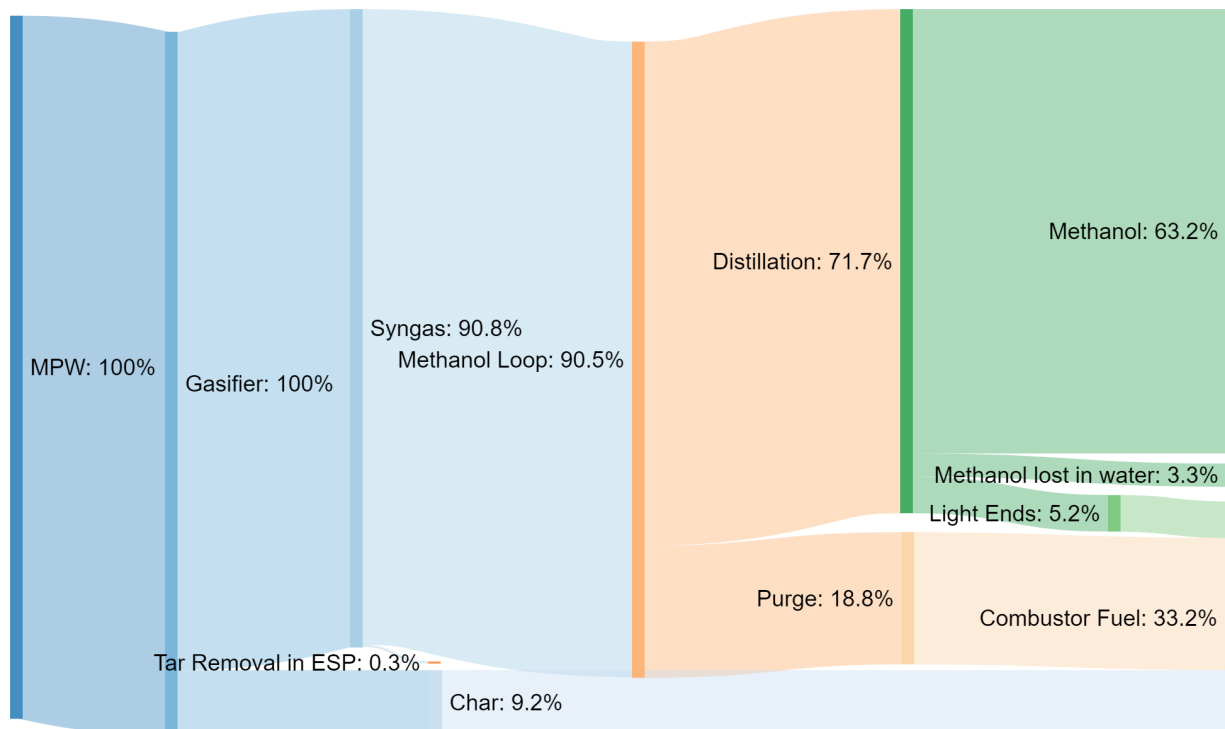

**Fig. S10.** Sankey diagram for carbon balance in the MPW-Methanol process. Carbon efficiency is 63.2%. Main losses are from the purge stream in methanol synthesis loop and the char formed in the gasifier.

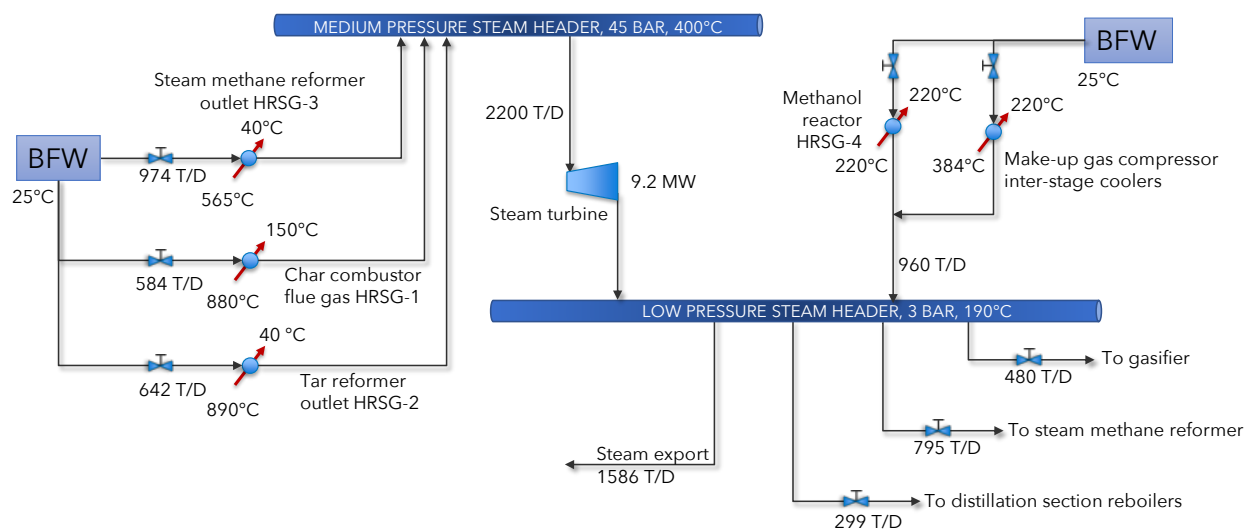

**Fig. S11.** Steam system for MPW-Methanol process. The low-pressure level for steam was chosen since that is the pressure at which steam is needed for the steam methane reformer and the distillation section reboilers. The flowrates of BFW through each exchanger is adjusted to meet the final steam quality requirements. Based on the steam flow shown here, appropriate penalties and credits were taken when performing the GHG emissions analysis by the Materials Flow through Industry (MFI) tool and Life Cycle Analysis (LCA).

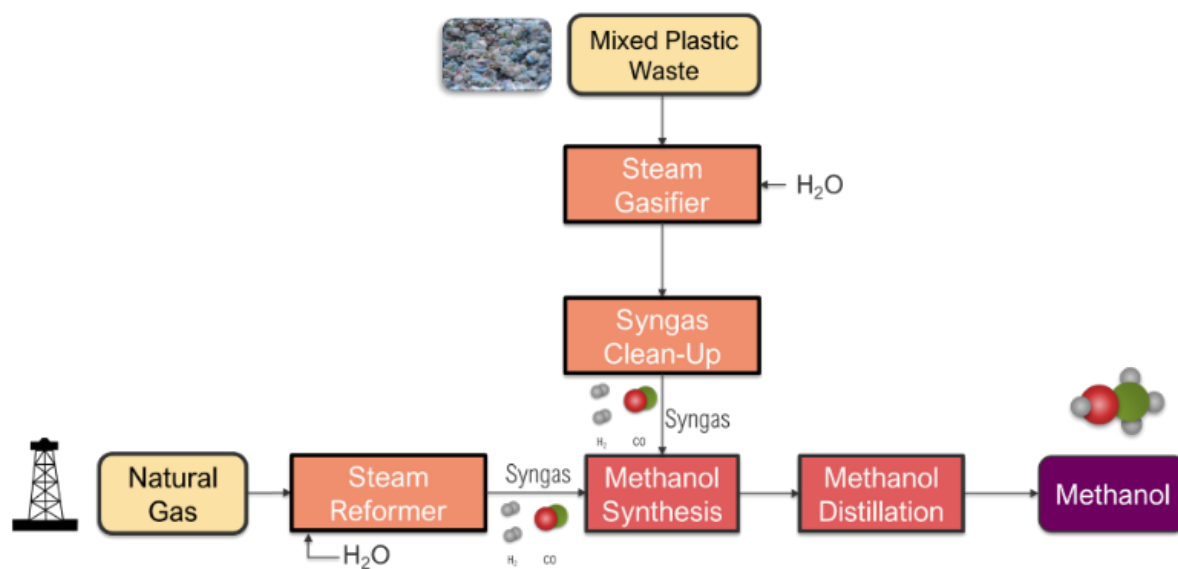

**Fig. S12.** Downstream processing of syngas remains the same irrespective of feedstock.



## S2. Supporting Tables

**Table S1.** Mass balance around MPW gasifier. The gasification data for MPW was taken from literature<sup>1</sup> as mentioned in the main text. This table was used to estimate the yield for each gas that was then input into the ASPEN Plus for modeling the gasifier. This applies to the gasifier in MPW-Methanol and MPW-Hydrogen processes.

| Syngas yield<br>(dry basis)                                                                                      | 1.38  | kg/kg                       |                    |              |           |          |                                      |
|------------------------------------------------------------------------------------------------------------------|-------|-----------------------------|--------------------|--------------|-----------|----------|--------------------------------------|
|                                                                                                                  | 2.1   | Nm <sup>3</sup> /kg         |                    |              |           |          |                                      |
| Gas                                                                                                              | %     | Nm <sup>3</sup> /kg plastic | Nm <sup>3</sup> /h | MW           | moles/h   | kg/h     | Yield for Aspen Plus<br>RYIELD model |
| H <sub>2</sub>                                                                                                   | 47    | 0.987                       | 9,870              | 2.0          | 440,616.9 | 888.2    | 2.96E-02                             |
| CO                                                                                                               | 22    | 0.462                       | 4,620              | 28.0         | 206,246.2 | 5,777.0  | 1.93E-01                             |
| CO <sub>2</sub>                                                                                                  | 5     | 0.105                       | 1,050              | 44.0         | 46,874.1  | 2,062.9  | 6.88E-02                             |
| CH <sub>4</sub>                                                                                                  | 17    | 0.357                       | 3,570              | 16.0         | 159,372.1 | 2,556.8  | 8.52E-02                             |
| C <sub>2</sub> H <sub>4</sub>                                                                                    | 8     | 0.168                       | 1,680              | 28.1         | 74,998.6  | 2,104.0  | 7.01E-02                             |
| C <sub>3</sub> H <sub>8</sub>                                                                                    | 1     | 0.021                       | 210                | 44.1         | 9,374.8   | 413.4    | 1.38E-02                             |
| Water out                                                                                                        | 14520 | kg/h                        |                    |              |           | 14,520.0 | 4.84E-01                             |
| C in tar from<br>tar analysis <sup>1</sup><br>(assumed to<br>be C <sub>10</sub> H <sub>8</sub> ,<br>naphthalene) | 31    | g/Nm <sup>3</sup>           | 65.1               | g/kg plastic |           | 651.0    | 2.17E-02                             |
| C in Char,<br>combustion<br>from mass<br>balance <sup>1</sup>                                                    |       |                             |                    |              |           | 944.5    | 3.15E-02                             |
| Ash                                                                                                              |       |                             |                    |              |           | 10.0     | 3.33E-04                             |
| Ash2                                                                                                             |       |                             |                    |              |           | 72.3     | 2.41E-03                             |

The MPW feedstock used in the gasification experiment<sup>1</sup> did not have impurities or contaminants with the PE, PP feed. This is corroborated from **Table S1**, where the ash content after gasification is low (0.8% of the solid feed). Hence, while selecting the feedstock prices, the natural HDPE prices were selected for PE which have much stricter requirements and are more expensive than colored HDPE bales.<sup>2</sup>

**Table S2.** Operating cost data. The operating costs are based on average of 2015-2019 values from an industry database.

| Utility / Operating cost               | Value   | Units   |
|----------------------------------------|---------|---------|
| Natural gas                            | 150.4   | \$/MT   |
| Oxygen import                          | 65.78   | \$/MT   |
| Cyclone and ESP operation <sup>3</sup> | 17.8    | \$/scfm |
| Olivine cost                           | 275.88  | \$/MT   |
| Boiler feed water                      | 0.29692 | \$/MT   |
| Electricity (fossil-fuel)              | 43.7    | \$/MWh  |
| Electricity (PV)                       | 79.2    | \$/MWh  |
| Cooling water (assuming 10 °C ΔT)      | 3.6509  | \$/Gcal |

**Table S3.** CAPEX breakdown by process sections for MPW-Methanol process. BFW-Boiler feedwater, HRSG-Heat recovery steam generator, SMR-Steam methane reformer.

| Equipment Name                           | Installation Factor | Capital cost (2016\$) |                |
|------------------------------------------|---------------------|-----------------------|----------------|
|                                          |                     | Equipment Cost        | Installed Cost |
| Gasification                             |                     |                       |                |
| Circulating fluidized bed reactor system | 2.47                | 1,767,262             | 4,365,138      |
| Syngas knock-out pot                     | 2.47                | 45,238                | 108,376        |
| Shredder                                 | 2                   | 157,725               | 274,408        |
| BFW pump                                 | 2.47                | 109,302               | 197,161        |
| HRSG-2                                   | 2.47                | 133,318               | 240,482        |
| HRSG-1                                   | 2.47                | 125,144               | 225,738        |
| HRSG-3                                   | 2.47                | 174,724               | 315,172        |
| Balance of plant                         |                     | 251,271               | 572,798        |
|                                          |                     | 2.76M                 | 6.30M          |
| Syngas preparation                       |                     |                       |                |
| Syngas compressor (1-stage)              | 1.80                | 2,534,833             | 4,562,700      |
| ZnO bed                                  | 2.47                | 22,890                | 56,538         |
| SMR Product/Feed exchanger               | 2.47                | 70,360                | 173,789        |
| SMR feed heater                          | 2.47                | 27,393                | 67,660         |
| SMR                                      | 2.47                | 3,730,077             | 9,213,290      |
| High pressure syngas separator           | 2.47                | 64,846                | 160,170        |
| Balance of plant                         |                     | 645,040               | 1,423,415      |
|                                          |                     | 7.1M                  | 15.66M         |
| Methanol synthesis                       |                     |                       |                |
| Make up gas compressor                   | 1.80                | 10,635,793            | 19,144,428     |
| Steam turbine                            | 1.80                | 5,618,200             | 10,282,643     |
| Methanol synthesis reactor/HRSG          | 2.60                | 387,973               | 1,008,729      |
| Methanol product/HRSG                    | 2.47                | 99,432                | 245,598        |
| Methanol knock-out pot                   | 2.47                | 66,940                | 165,342        |
| Recycle gas compressor                   | 1.80                | 1,277,870             | 2,300,166      |
| Recycle gas heater/Inter-stage cooler    | 2.47                | 37,825                | 93,427         |
| Inter-stage cooler/HRSG-2                | 2.47                | 21,439                | 52,955         |
| Inter-stage cooler/HRSG-3                | 2.47                | 37,603                | 92,880         |
| BFW pump                                 | 2.47                | 83,145                | 205,369        |
| Balance of plant                         |                     | 1,826,622             | 3,359,154      |
|                                          |                     | 20.09M                | 36.95M         |
| Methanol distillation                    |                     |                       |                |
| Crude methanol exchanger/LPS             | 2.47                | 10,446                | 18,842         |
| Distillation column – 1 (C1)             | 1.30                | 125,316               | 162,911        |
| C1 condensor CW Cooler                   | 2.47                | 22,758                | 56,212         |
| Distillation column – 2 (C2)             | 1.27                | 281,278               | 357,223        |
| C1 reboiler/LPS exchanger                | 2.47                | 28,008                | 69,181         |
| C2 condensor CW cooler                   | 2.47                | 95,306                | 235,406        |
| C2 reboiler/LPS exchanger                | 2.47                | 44,934                | 110,988        |
| C2 feed CW cooler                        | 2.47                | 72,337                | 178,674        |
| C1 combined vapor heater/LPS exchanger   | 2.47                | 8,961                 | 22,133         |
| Balance of plant                         |                     | 68,935                | 121,157        |
|                                          |                     | 0.76M                 | 1.33M          |

|                                 |              |               |
|---------------------------------|--------------|---------------|
| <b>Total installed cost</b>     | <b>30.7M</b> | <b>60.2M</b>  |
| Outside battery limit           |              | 15,060,440    |
| Site development and piping     |              | 13,177,885    |
| Total indirect costs            |              | 53,088,051    |
| Land and working capital        |              | 7,218,407     |
| <b>TOTAL CAPITAL INVESTMENT</b> |              | <b>148.8M</b> |

**Table S4.** OPEX breakdown for MPW-Methanol process. ESP-Electrostatic precipitator, NG-natural gas, MUG-make up gas, RG-recycle gas, CW-cooling water.

| Variable operating costs (\$M/y)    |           |               |              | 53.9 |
|-------------------------------------|-----------|---------------|--------------|------|
| Raw material/utility                | Value     | Units         | \$M/y (2016) |      |
| Gasification                        |           |               |              |      |
| MPW                                 | 10,000    | kg/h          | 47.3         |      |
| External NG for heating             | 1,051     | kg/h          | 1.25         |      |
| NG in tar reformer                  | 7.9       | Gcal/h        | 0.7          |      |
| Cyclone and ESP operation           | 1,415,427 | ft³/h of gas  | 0.37         |      |
| Make-up olivine cost                | 297       | kg/h          | 0.65         |      |
| BFW                                 | 91,625    | kg/h          | 0.21         |      |
| BFW pump                            | 162.4     | kW            | 0.06         |      |
| Tar reformer catalyst cost          |           |               | 0.09         |      |
| Tar reformer catalyst replenishment |           |               | 1.41         |      |
| LPS credit (@\$5.7/MT)              | 65,986    | kg/h          | -2.97        |      |
| Wastewater treatment                | 9,272     | kg/h          | 0.07         |      |
| Hammermill operation power input    | 116       | kWh/MT        | 0.4          |      |
| Disposal of solids                  | 82        | kg/h          | 0.04         |      |
|                                     |           |               | 49.58        |      |
| Syngas preparation                  |           |               |              |      |
| Syngas compression                  | 1976.7    | kW            | 0.68         |      |
| ZnO bed catalyst                    | 694,457   | ft³/h of gas  | 0.01         |      |
| SMR feed preheater                  | 0.3       | Gcal/h        | 0.03         |      |
| SMR furnace duty                    | 17.0      | Gcal/h        | 1.51         |      |
| SMR catalyst                        | 2,961,707 | sft³/h of gas | 0.15         |      |
| BFW credit                          | 25,494    | kg/h          | -0.06        |      |
|                                     |           |               | 2.33         |      |
| Methanol synthesis                  |           |               |              |      |
| Compression duty for MUG compressor | 11870.6   | kW            | 4.09         |      |
| Turbine electricity credit          | 9205.6    | kW            | -3.17        |      |
| Compression duty for RG compressor  | 839.7     | kW            | 0.29         |      |
| BFW                                 | 39,999    | kg/h          | 0.09         |      |
| BFW pump                            | 3.7       | kW            | 0            |      |
| Methanol synthesis catalyst         | 3,939,105 | sft³/h of gas | 0.21         |      |

|                                 |               |                   |                   |       |
|---------------------------------|---------------|-------------------|-------------------|-------|
|                                 |               |                   | 1.51              |       |
| Methanol distillation           |               |                   |                   |       |
| C1 condensor (CW)               | 0.4           | Gcal/h            | 0.01              |       |
| C2 condensor (CW)               | 11.4          | Gcal/h            | 0.33              |       |
| Cooling duty for C2 feed cooler | 6.1           | Gcal/h            | 0.18              |       |
| BFW credit                      | 12,500        | kg/h              | -0.03             |       |
|                                 |               |                   | 0.49              |       |
| Fixed operating costs (\$M/y)   |               |                   |                   |       |
| Labor and supervision (\$M/y)   |               |                   | 2.94              |       |
| Position                        | Salary (2016) | # Required        | Total Cost (2016) |       |
| Plant Manager                   | \$164,452     | 1                 | \$164,452         |       |
| Plant Engineer                  | \$78,310      | 1                 | \$78,310          |       |
| Maintenance Supr                | \$63,767      | 1                 | \$63,767          |       |
| Maintenance Tech                | \$44,749      | 6                 | \$268,493         |       |
| Lab Manager                     | \$62,648      | 1                 | \$62,648          |       |
| Lab Technician                  | \$44,749      | 1                 | \$44,749          |       |
| Shift Supervisor                | \$53,699      | 3                 | \$161,096         |       |
| Shift Operators                 | \$44,749      | 12                | \$536,985         |       |
| Yard Employees                  | \$31,324      | 4                 | \$125,297         |       |
| Clerks & Secretaries            | \$40,274      | 1                 | \$40,274          |       |
| Total Salaries                  |               |                   | \$1,546,070       |       |
| Labor Burden                    | 90.00%        | of Total Salaries | \$1,391,463       |       |
| Overhead (\$M/y)                |               |                   | 5.24              |       |
| Maintenance                     | 3.00%         | of FCI            | \$4,247,044       |       |
| Property Insur. & Tax           | 0.70%         | of FCI            | \$990,977         |       |
| TOTAL OPERATING COST (\$M/y)    |               |                   |                   | 62.08 |

**Table S5.** MSP breakdown for MPW-Methanol process.

| <b>MSP breakdown (\$/kg)</b> |           |             |                    |             |                  |                   |         |             |
|------------------------------|-----------|-------------|--------------------|-------------|------------------|-------------------|---------|-------------|
| Process section              | Feedstock | Natural gas | Catalysts, BFW, CW | Electricity | Capital Recovery | Other Operational | Credits | Total       |
| Gasification                 | 0.41      | 0.02        | 0.02               | 0.00        | 0.01             | 0.00              | -0.03   | 0.43        |
| Syngas preparation           | 0.00      | 0.01        | 0.00               | 0.01        | 0.02             | 0.00              | 0.00    | 0.04        |
| Methanol synthesis           | 0.00      | 0.00        | 0.00               | 0.04        | 0.04             | 0.00              | -0.03   | 0.05        |
| Methanol distillation        | 0.00      | 0.00        | 0.00               | 0.00        | 0.00             | 0.00              | 0.00    | 0.01        |
| OSBL                         | 0.00      | 0.00        | 0.00               | 0.00        | 0.10             | 0.07              | 0.00    | 0.17        |
| Total                        | 0.41      | 0.03        | 0.03               | 0.04        | 0.17             | 0.07              | -0.05   | <b>0.70</b> |

**Table S6.** Reasoning for choice of bounds for sensitivity analysis for MPW-Methanol process. This table applies to the MPW-Hydrogen process too.

| Sensitivity                                        | Reasoning for choice of bounds                                                                                                                                                                                                                                                                                                                                                                                                                                                                                                                                                                                                                                                                                                         | MSP-lower end, \$/kg | MSP-higher end, \$/kg |
|----------------------------------------------------|----------------------------------------------------------------------------------------------------------------------------------------------------------------------------------------------------------------------------------------------------------------------------------------------------------------------------------------------------------------------------------------------------------------------------------------------------------------------------------------------------------------------------------------------------------------------------------------------------------------------------------------------------------------------------------------------------------------------------------------|----------------------|-----------------------|
| Yield, kg dry syngas/kg solid (1.4, 1.0)           | The base case yield is 1.4 kg dry syngas/kg solid. The lower point of 1.0 kg dry syngas/kg solid represents a reduction in gasifier yield, which could be due to design/operation issues with the gasifier. A yield greater than 1.4 kg dry syngas/kg solid results in a mass balance error for carbon and hence only a lower point was considered. Theoretically, much higher yield (2.3 kg dry syngas/kg MPW) is possible through steam gasification, if all solid MPW was converted only to (CO+H <sub>2</sub> ) without any side-products or losses by char formation. But not all carbon atoms end up as CO in the gasifier, which is the main reason of increase in mass yield. Only about 29% of total carbon input ends in CO. | 0.7                  | 0.91                  |
| Feedstock cost, \$/kg (0.40, 0.60, 0.80)           | This range was chosen based on prices in Recycling Markets <sup>2</sup> . Higher prices could be due to higher labor and sorting costs in certain geographic locations.                                                                                                                                                                                                                                                                                                                                                                                                                                                                                                                                                                | 0.56                 | 0.83                  |
| Plant capacity, MT/D (500, 240, 100)               | Recent plants utilizing the MPW feedstock are in the 120 – 300 MT/D range and hence plant capacity bounds were chosen accordingly.                                                                                                                                                                                                                                                                                                                                                                                                                                                                                                                                                                                                     | 0.64                 | 0.8                   |
| Methanol loop purge fraction, % (5, 15, 25)        | This represents variability in amount of gas purged from the synthesis loop to the fuel gas system. A higher conversion to methanol in reactor will enable operators to lower the purge flow and vice versa.                                                                                                                                                                                                                                                                                                                                                                                                                                                                                                                           | 0.63                 | 0.77                  |
| Single pass conversion to methanol, % (50, 40, 30) | This variability is used to span the range of conversions of different catalysts for methanol synthesis.                                                                                                                                                                                                                                                                                                                                                                                                                                                                                                                                                                                                                               | 0.65                 | 0.77                  |
| IRR, % (5, 10, 15)                                 | This is a financial parameter.                                                                                                                                                                                                                                                                                                                                                                                                                                                                                                                                                                                                                                                                                                         | 0.64                 | 0.75                  |
| TCI (-15%, base, +30%)                             | The variability in TCI due to inflation, location and price fluctuations is represented in this sensitivity.                                                                                                                                                                                                                                                                                                                                                                                                                                                                                                                                                                                                                           | 0.67                 | 0.76                  |
| Steam export credit (with, without)                | This represents a case where the steam export credit is not accounted for, which is a plausible scenario if the plant is located in a remote region without a steam customer in close proximity to the plant.                                                                                                                                                                                                                                                                                                                                                                                                                                                                                                                          | 0.7                  | 0.72                  |
| Steam/Carbon in SMR (1.5, 3, 4.5)                  | The SMR catalyst has Steam/Carbon (S/C) limitations to avoid coke formation. A higher S/C ratio reduces risk of coke formation but increase energy requirement. This variability is captured in the range shown as per industrial conditions <sup>4</sup> (3 – 4.5) and the 1.5 represents an optimistic case.                                                                                                                                                                                                                                                                                                                                                                                                                         | 0.69                 | 0.71                  |
| Income tax rate, % (15, 21, 35)                    | This is a financial parameter.                                                                                                                                                                                                                                                                                                                                                                                                                                                                                                                                                                                                                                                                                                         | 0.69                 | 0.71                  |
| Methanol catalyst cost, \$/kg (1.8, 18, 180)       | This order-of-magnitude change is used as sensitivity to span the catalyst cost domain for different metal catalysts.                                                                                                                                                                                                                                                                                                                                                                                                                                                                                                                                                                                                                  | 0.69                 | 0.71                  |
| Electricity cost, \$/MWh (43.7, 79.2)              | The base case electricity cost is 43.7 \$/MWh. The 79.2 \$/MWh point is used as a case for higher utility cost from different renewable sources <sup>5</sup> .                                                                                                                                                                                                                                                                                                                                                                                                                                                                                                                                                                         | 0.7                  | 0.71                  |
| Methanol conversion to DME, % (5, 10, 15)          | This sensitivity represents the case where a methanol catalyst is producing low or higher side-products (simulated as DME here).                                                                                                                                                                                                                                                                                                                                                                                                                                                                                                                                                                                                       | 0.69                 | 0.7                   |

**Table S7.** Mass balance around MSW gasifier. The gasification data for MPW was taken from literature<sup>6</sup> as mentioned in the main text. This table was used to estimate the yield for each gas that was then input into the ASPEN Plus for modeling the gasifier. This applies to the gasifier in MSW-Methanol and MSW-Hydrogen processes.

| Syngas yield (dry basis)       | 1.0      | kg/kg               |        |             |       |                                   |
|--------------------------------|----------|---------------------|--------|-------------|-------|-----------------------------------|
|                                | 0.8      | Nm <sup>3</sup> /kg |        |             |       |                                   |
| Gas                            | %        | Nm <sup>3</sup>     | kmol   | MW, kg/kmol | MT/D  | Yield for Aspen Plus RYIELD model |
| N <sub>2</sub>                 | 0.81     | 1320.776            | 58.9   | 28.0        | 1.7   | 4.17E-03                          |
| H <sub>2</sub>                 | 11.86    | 19355.079           | 863.5  | 2.0         | 1.7   | 4.40E-03                          |
| CO                             | 20.36    | 33231.382           | 1482.6 | 28.0        | 41.5  | 1.05E-01                          |
| CO <sub>2</sub>                | 41.03    | 66968.245           | 2987.8 | 44.0        | 131.5 | 3.32E-01                          |
| CH <sub>4</sub>                | 9.93     | 16208.044           | 723.1  | 16.0        | 11.6  | 2.93E-02                          |
| C <sub>2</sub> H <sub>6</sub>  | 10.23    | 16697.220           | 744.9  | 30.1        | 22.4  | 5.66E-02                          |
| C <sub>3</sub> H <sub>8</sub>  | 4.99     | 8136.634            | 363.0  | 44.1        | 16.0  | 4.04E-02                          |
| C <sub>10</sub> H <sub>8</sub> | 0.71     | 1157.717            | 51.7   | 128.2       | 6.6   | 1.67E-02                          |
| NH <sub>3</sub>                | 5.99E-02 | 97.835              | 4.4    | 17.0        | 0.1   | 1.88E-04                          |
| H <sub>2</sub> S               | 8.19E-03 | 13.371              | 0.6    | 34.1        | 0.0   | 5.13E-05                          |
| COS                            | 8.19E-03 | 13.371              | 0.6    | 60.1        | 0.0   | 9.05E-05                          |
| HCl                            | 2.00E-04 | 0.326               | 0.0    | 36.5        | 0.0   | 1.34E-06                          |

**Table S8.** CAPEX breakdown by process sections for MSW-Methanol process.

| Equipment name                 | Installation factor | Capital cost (2016\$) |                |
|--------------------------------|---------------------|-----------------------|----------------|
|                                |                     | Equipment cost        | Installed cost |
| Gasification                   |                     |                       |                |
| Fixed bed gasifier system      | 2.47                | 2,004,988             | 4,952,320      |
| Syngas knock-out pot           | 2.47                | 29,404                | 70,443         |
| BFW pump                       | 2.47                | 69,603                | 125,551        |
| HRSG-2                         | 2.47                | 70,839                | 127,781        |
| HRSG-1                         | 2.47                | 63,389                | 114,343        |
| HRSG-3                         | 2.47                | 42,867                | 77,324         |
| Balance of plant               |                     | 243,881               | 574,217        |
|                                |                     | 2.53M                 | 6.04M          |
| Syngas preparation             |                     |                       |                |
| Syngas compressor (1-stage)    | 1.80                | 1,360,168             | 2,448,303      |
| LO-CAT absorption vessel       | 2.47                | 127,611               | 315,200        |
| ZnO bed                        | 2.47                | 17,964                | 44,372         |
| SMR Product/Feed exchanger     | 2.47                | 43,220                | 106,754        |
| SMR feed heater                | 2.47                | 16,017                | 39,561         |
| Steam methane reformer         | 2.47                | 1,274,681             | 3,148,462      |
| High pressure syngas separator | 2.47                | 36,227                | 89,480         |
| Balance of plant               |                     | 287,589               | 619,213        |
|                                |                     | 3.16M                 | 6.81M          |

| Methanol synthesis                     |      |               |               |
|----------------------------------------|------|---------------|---------------|
| Make up gas compressor                 | 1.80 | 4,572,339     | 8,230,210     |
| Steam turbine                          | 1.80 | 2,423,695     | 4,435,939     |
| Methanol synthesis reactor/HRSG        | 2.60 | 195,537       | 508,396       |
| Methanol product/HRSG                  | 2.47 | 41,238        | 101,857       |
| Methanol knock-out pot                 | 2.47 | 33,738        | 83,332        |
| Recycle gas compressor                 | 1.80 | 349,324       | 628,783       |
| Recycle gas heater/Inter-stage cooler  | 2.47 | 13,221        | 32,655        |
| Inter-stage cooler/HRSG-2              | 2.47 | 10,202        | 25,198        |
| Inter-stage cooler/HRSG-3              | 2.47 | 19,002        | 46,934        |
| Inter-stage cooler/HRSG-4B             | 2.47 | 11,153        | 27,547        |
| BFW pump                               | 2.47 | 58,916        | 145,522       |
| Acid gas removal system                | 2.61 | 632,902       | 1,651,875     |
| Balance of plant                       |      | 836,127       | 1,591,825     |
|                                        |      | <b>9.20M</b>  | <b>17.51M</b> |
| Methanol distillation                  |      |               |               |
| Crude methanol exchanger/LPS           | 2.47 | 4,773         | 8,609         |
| Distillation column – 1 (C1)           | 1.30 | 54,851        | 71,306        |
| C1 condensor CW cooler                 | 2.47 | 13,345        | 32,961        |
| Distillation column – 2 (C2)           | 1.27 | 120,028       | 152,436       |
| C1 reboiler/LPS Exchanger              | 2.47 | 12,408        | 30,647        |
| C2 condensor CW cooler                 | 2.47 | 55,710        | 137,604       |
| C2 reboiler/LPS exchanger              | 2.47 | 21,595        | 53,340        |
| C2 feed CW cooler                      | 2.47 | 41,215        | 101,801       |
| C1 combined vapor heater/LPS exchanger | 2.47 | 3,898         | 9,628         |
| Balance of plant                       |      | 32,782        | 59,833        |
|                                        |      | <b>0.36M</b>  | <b>0.66M</b>  |
| <b>Total installed cost</b>            |      | <b>15.39M</b> | <b>31.27M</b> |
| Outside battery limit                  |      |               | 7,823,993     |
| Site development and piping            |      |               | 6,845,994     |
| Total indirect costs                   |      |               | 27,579,576    |
| Land and working capital               |      |               | 3,817,277     |
| <b>TOTAL CAPITAL INVESTMENT</b>        |      |               | <b>77.36M</b> |

**Table S9.** OPEX breakdown for MSW-Methanol process.

| Variable operating costs (\$M/y)    |           |              |              | 5.20 |
|-------------------------------------|-----------|--------------|--------------|------|
| Raw material/utility                | Value     | Units        | \$M/y (2016) |      |
| Gasification                        |           |              |              |      |
| Natural gas usage                   | 4.5       | Gcal/h       | 0.40         |      |
| Oxygen import                       | 2,085     | kg/h         | 1.08         |      |
| Cyclone and ESP operation           | 652,546   | ft³/h of gas | 0.17         |      |
| BFW                                 | 23,338    | kg/h         | 0.05         |      |
| BFW pump                            | 53.2      | kW           | 0.02         |      |
| Tar reformer catalyst cost          | 2,682,176 | ft³/h of gas | 0.03         |      |
| Tar reformer catalyst replenishment |           |              | 0.54         |      |
| LPS credit (@\$5.7/mt)              | 22,217    | kg/h         | -1.00        |      |
| Waste water treatment               | 1,354     | kg/h         | 0.01         |      |
| Waste disposal                      | 2,367     | kg/h         | 1.10         |      |
|                                     |           |              | 2.41         |      |
| Syngas preparation                  |           |              |              |      |
| Syngas compression                  | 907.8     | kW           | 0.31         |      |
| LO-CAT chemicals                    | 2         | kg/h         | 0.00         |      |

|                                      |               |                   |                   |              |
|--------------------------------------|---------------|-------------------|-------------------|--------------|
| ZnO bed catalyst                     | 317,091       | ft³/h of gas      | 0.00              |              |
| SMR catalyst                         | 929,276       | sft³/h of gas     | 0.05              |              |
| BFW credit                           | 6,480         | kg/h              | -0.02             |              |
|                                      |               |                   | <b>0.35</b>       |              |
| <b>Methanol synthesis</b>            |               |                   |                   |              |
| Compression duty for MUG compressor  | 4132.2        | kW                | 1.42              |              |
| Turbine electricity credit           | 2769.8        | kW                | -0.95             |              |
| Compression duty for RG compressor   | 166.0         | kW                | 0.06              |              |
| BFW                                  | 14,083        | kg/h              | 0.03              |              |
| BFW pump                             | 1.7           | kW                | 0.00              |              |
| Methanol synthesis catalyst          | 974,520       | sft³/h of gas     | 0.05              |              |
| CO <sub>2</sub> separation unit      | 5,041         | kg/h              | 1.68              |              |
|                                      |               |                   | <b>2.29</b>       |              |
| <b>Methanol distillation</b>         |               |                   |                   |              |
| C1 column condensor (CW)             | 0.1           | Gcal/h            | 0.00              |              |
| C2 column condensor (CW)             | 3.4           | Gcal/h            | 0.10              |              |
| Cooling duty for C-2 feed cooler     | 1.7           | Gcal/h            | 0.05              |              |
| BFW credit                           | 3,537         | kg/h              | -0.01             |              |
| Waste water treatment                | 1,413         | kg/h              | 0.01              |              |
|                                      |               |                   | <b>0.15</b>       |              |
| <b>Fixed operating costs (\$M/y)</b> |               |                   |                   | <b>5.66</b>  |
| <b>Labor and supervision (\$M/y)</b> |               |                   | <b>2.94</b>       |              |
| Position                             | Salary (2016) | # Required        | Total Cost (2016) |              |
| Plant Manager                        | \$164,452     | 1                 | \$164,452         |              |
| Plant Engineer                       | \$78,310      | 1                 | \$78,310          |              |
| Maintenance Supr                     | \$63,767      | 1                 | \$63,767          |              |
| Maintenance Tech                     | \$44,749      | 6                 | \$268,493         |              |
| Lab Manager                          | \$62,648      | 1                 | \$62,648          |              |
| Lab Technician                       | \$44,749      | 1                 | \$44,749          |              |
| Shift Supervisor                     | \$53,699      | 3                 | \$161,096         |              |
| Shift Operators                      | \$44,749      | 12                | \$536,985         |              |
| Yard Employees                       | \$31,324      | 4                 | \$125,297         |              |
| Clerks & Secretaries                 | \$40,274      | 1                 | \$40,274          |              |
| Total Salaries                       |               |                   | \$1,546,070       |              |
| Labor Burden                         | 90.00%        | of Total Salaries | \$1,391,463       |              |
| <b>Overhead (\$M/y)</b>              |               |                   | <b>2.72</b>       |              |
| Maintenance                          | 3.00%         | of FCI            | \$2,206,366       |              |
| Property Insur. & Tax                | 0.70%         | of FCI            | \$514,819         |              |
| <b>TOTAL OPERATING COST (\$M/y)</b>  |               |                   |                   | <b>10.86</b> |



**Table S10.** MSP breakdown for MSW-Methanol process.

| MSP breakdown (\$/kg) |           |             |                    |             |                  |                   |         |             |
|-----------------------|-----------|-------------|--------------------|-------------|------------------|-------------------|---------|-------------|
| Process area          | Feedstock | Natural gas | Catalysts, BFW, CW | Electricity | Capital Recovery | Other Operational | Credits | Total       |
| Gasification          | 0.03      | 0.01        | 0.02               | 0.00        | 0.02             | 0.03              | -0.03   | 0.09        |
| Syngas preparation    | 0.00      | 0.00        | 0.00               | 0.01        | 0.02             | 0.00              | 0.00    | 0.03        |
| Methanol synthesis    | 0.00      | 0.00        | 0.00               | 0.04        | 0.06             | 0.04              | -0.03   | 0.12        |
| Methanol distillation | 0.00      | 0.00        | 0.00               | 0.00        | 0.00             | 0.00              | 0.00    | 0.01        |
| OSBL                  | 0.00      | 0.00        | 0.00               | 0.00        | 0.16             | 0.15              | 0.00    | 0.31        |
| Total                 | 0.03      | 0.01        | 0.02               | 0.05        | 0.26             | 0.23              | -0.05   | <b>0.55</b> |

**Table S11.** Reasoning for choice of bounds for sensitivity analysis for MSW-Methanol process. This table applies to the MSW-Hydrogen process too.

| Sensitivity                                        | Reasoning for choice of bounds                                                                                                                                                                                                                                                                                 | MSP-lower end, \$/kg | MSP-higher end, \$/kg |
|----------------------------------------------------|----------------------------------------------------------------------------------------------------------------------------------------------------------------------------------------------------------------------------------------------------------------------------------------------------------------|----------------------|-----------------------|
| Plant capacity, MT/D (500, 240, 100)               | Recent plants utilizing MSW feedstock are in the 120 – 300 MT/D range and hence plant capacity bounds were chosen accordingly.                                                                                                                                                                                 | 0.45                 | 0.76                  |
| Steam/Carbon in SMR, (1, 1.3, 3)                   | The SMR catalyst has Steam/Carbon (S/C) limitations to avoid coke formation. A higher S/C ratio reduces risk of coke formation but increase energy requirement. This variability is captured in the range shown as per industrial conditions <sup>4</sup> (3 – 4.5) and the 1.5 represents an optimistic case. | 0.51                 | 0.73                  |
| IRR, % (5, 10, 15)                                 | This is a financial parameter.                                                                                                                                                                                                                                                                                 | 0.46                 | 0.64                  |
| TCI (-15%, base, +30%)                             | The variability in TCI due to inflation, location and price fluctuations is represented in this sensitivity.                                                                                                                                                                                                   | 0.50                 | 0.65                  |
| Tipping fee, \$/MT (79.4, 59.2, 0)                 | The base case assumes the MSW feed in RDF form is available at zero cost. The US average landfilling fee is \$59.2/MT and the Pacific region landfilling fee is \$79.4/MT. <sup>7</sup> A feedstock preparation cost <sup>8</sup> of \$20/MT was used for the cases where the tipping fee was considered.      | 0.43                 | 0.47                  |
| Methanol loop purge fraction, % (5, 15, 25)        | This represents variability in amount of gas purged from the synthesis loop to the fuel gas system. A higher conversion to methanol in reactor will enable operators to lower the purge flow and vice versa.                                                                                                   | 0.50                 | 0.60                  |
| Yield, kg dry syngas/kg solid (1, 0.7)             | The base case yield is 1.0 kg dry syngas/kg solid. The lower point of 0.7 kg dry syngas/kg solid represents a reduction in gasifier yield, which could be due to design/operation issues with the gasifier.                                                                                                    | 0.55                 | 0.65                  |
| Single pass conversion to methanol, % (50, 40, 30) | This variability is used to span the range of conversions of different catalysts for methanol synthesis.                                                                                                                                                                                                       | 0.52                 | 0.61                  |
| Methanol conversion to DME, % (5, 10, 15)          | This sensitivity represents the case where a methanol catalyst is producing low or higher side-products (simulated as DME here).                                                                                                                                                                               | 0.53                 | 0.57                  |

|                                             |                                                                                                                                                               |      |      |
|---------------------------------------------|---------------------------------------------------------------------------------------------------------------------------------------------------------------|------|------|
| ASU CAPEX<br>(Not included,<br>Included)    | This sensitivity variable was added to study the effect of including the Air separation unit (ASU) CAPEX in the capital costs.                                | 0.55 | 0.60 |
| Income tax<br>rate, % (15,<br>21, 35)       | This is a financial parameter.                                                                                                                                | 0.55 | 0.57 |
| Electricity<br>cost, \$/MWh<br>(43.7, 79.2) | The base case electricity cost is 43.7 \$/MWh. The 79.2 \$/MWh point is used as a case for higher utility cost from different renewable sources. <sup>5</sup> | 0.55 | 0.57 |

**Table S12.** CAPEX breakdown by process sections for MPW-Hydrogen process.

| Equipment name                                     | Installation factor | Capital cost (2016\$) |                |
|----------------------------------------------------|---------------------|-----------------------|----------------|
|                                                    |                     | Equipment cost        | Installed cost |
| Gasification                                       |                     |                       |                |
| Circulating fluidized bed reactor system           | 2.47                | 1,767,262             | 4,365,138      |
| Syngas knock-out pot                               | 2.47                | 45,238                | 108,376        |
| Hammermill/Shredder                                | 1.7                 | 144,154               | 245,061        |
| BFW pump                                           | 2.47                | 113,552               | 204,828        |
| HRSG-2                                             | 2.47                | 133,318               | 240,482        |
| HRSG-1                                             | 2.47                | 160,162               | 288,905        |
| HRSG-3                                             | 2.47                | 174,724               | 315,172        |
| Balance of plant                                   |                     | 255,198               | 579,882        |
|                                                    |                     | 2.79M                 | 6.35M          |
| Syngas preparation                                 |                     |                       |                |
| Syngas compressor (1-stage)                        | 1.8                 | 2,534,833             | 4,562,700      |
| ZnO bed                                            | 2.47                | 22,890                | 56,538         |
| SMR Product/Feed exchanger                         | 2.47                | 70,360                | 173,789        |
| SMR feed heater                                    | 2.47                | 27,393                | 67,660         |
| Steam methane reformer                             | 2.47                | 3,820,269             | 9,436,066      |
| High pressure syngas separator                     | 2.47                | 64,846                | 160,170        |
| Balance of plant                                   |                     | 654,059               | 1,445,692      |
|                                                    |                     | 7.19M                 | 15.90M         |
| Water-gas-shift                                    |                     |                       |                |
| Main compressor                                    | 1.8                 | 6,233,501             | 11,220,302     |
| Steam turbine                                      | 1.8                 | 6,846,431             | 12,530,599     |
| BFW pump                                           | 2.47                | 78,822                | 194,690        |
| Water-gas-shift reactor                            | 2.47                | 43,273                | 106,885        |
| WGS HRSG                                           | 2.47                | 154,357               | 381,261        |
| Cooling water exchanger (for WGS reaction mixture) | 2.47                | 68,165                | 122,957        |
| Knock-out pot                                      | 2.47                | 70,941                | 175,225        |
| Balance of plant                                   |                     | 1,349,549             | 2,473,192      |
|                                                    |                     | 14.85M                | 27.21M         |
| Pressure swing adsorption                          |                     |                       |                |
| Pressure swing adsorption unit                     | 1.9                 | 4,427,976             | 8,413,154      |
| Balance of plant                                   |                     | 442,798               | 841,315        |
|                                                    |                     | 4.87M                 | 9.25M          |
|                                                    | Total               | 29.72M                | 58.74M         |
| Outside battery limit                              |                     |                       | 14,685,223     |
| Site development and piping                        |                     |                       | 12,849,570     |
| Total indirect costs                               |                     |                       | 51,765,411     |

|                                 |                |
|---------------------------------|----------------|
| Land and working capital        | 7,042,055      |
| <b>TOTAL CAPITAL INVESTMENT</b> | <b>145.08M</b> |

**Table S13. OPEX breakdown for MPW-Hydrogen process.**

| Variable operating costs (\$M/y)     |               |               |                   | 51.76 |
|--------------------------------------|---------------|---------------|-------------------|-------|
| Raw material/utility                 | Value         | Units         | \$M/y (2016)      |       |
| Gasification                         |               |               |                   |       |
| MPW                                  | 10,000        | kg/h          | 47.30             |       |
| External NG for heating              | 1,866         | kg/h          | 2.21              |       |
| NG in tar reformer                   | 7.9           | Gcal/h        | 0.70              |       |
| Cyclone and ESP operation            | 1,415,427     | ft³/h of gas  | 0.37              |       |
| Make-up olivine cost                 | 297           | kg/h          | 0.65              |       |
| BFW                                  | 102,854       | kg/h          | 0.24              |       |
| BFW pump                             | 179.5         | kW            | 0.06              |       |
| Tar reformer catalyst cost           | 7,017,113     | ft³/h of gas  | 0.09              |       |
| Tar reformer catalyst replenishment  |               |               | 1.41              |       |
| LPS credit (@\$5.7/MT)               | 49,717        | kg/h          | -2.23             |       |
| Wastewater treatment                 | 9,272         | kg/h          | 0.07              |       |
| Hammermill operation power input     | 116           | kWh/MT        | 0.40              |       |
| Disposal of solids                   | 82            | kg/h          | 0.04              |       |
|                                      |               |               | 51.31             |       |
| Syngas preparation                   |               |               |                   |       |
| Syngas compression                   | 1976.7        | kW            | 0.68              |       |
| ZnO bed catalyst                     | 694,457       | ft³/h of gas  | 0.01              |       |
| SMR feed preheater                   | 0.3           | Gcal/h        | 0.03              |       |
| SMR furnace duty                     | 17.6          | Gcal/h        | 1.57              |       |
| SMR catalyst                         | 2,961,707     | sft³/h of gas | 0.15              |       |
| BFW credit                           | 25,494        | kg/h          | -0.06             |       |
|                                      |               |               | 2.38              |       |
| Water-gas-shift                      |               |               |                   |       |
| Compression duty for main compressor | 6087.3        | kW            | 2.10              |       |
| Turbine electricity credit           | 12210.1       | kW            | -4.21             |       |
| BFW                                  | 34,023        | kg/h          | 0.08              |       |
| BFW pump                             | 30.8          | kW            | 0.01              |       |
| Water-gas-shift catalyst             | 55,608        | sft³/h of gas | 0.00              |       |
| Raw hydrogen gas cooler              | 5.3           | Gcal/h        | 0.15              |       |
| BFW credit                           | 29,559        | kg/h          | -0.07             |       |
|                                      |               |               | -1.93             |       |
| Fixed operating cost (\$M/y)         |               |               |                   | 8.05  |
| Labor and supervision (\$M/y)        |               |               | 2.94              |       |
| Position                             | Salary (2016) | # Required    | Total Cost (2016) |       |
| Plant Manager                        | \$164,452     | 1             | \$164,452         |       |
| Plant Engineer                       | \$78,310      | 1             | \$78,310          |       |
| Maintenance Supr                     | \$63,767      | 1             | \$63,767          |       |
| Maintenance Tech                     | \$44,749      | 6             | \$268,493         |       |
| Lab Manager                          | \$62,648      | 1             | \$62,648          |       |
| Lab Technician                       | \$44,749      | 1             | \$44,749          |       |
| Shift Supervisor                     | \$53,699      | 3             | \$161,096         |       |
| Shift Operators                      | \$44,749      | 12            | \$536,985         |       |
| Yard Employees                       | \$31,324      | 4             | \$125,297         |       |
| Clerks & Secretaries                 | \$40,274      | 1             | \$40,274          |       |

|                                     |       |                   |             |             |
|-------------------------------------|-------|-------------------|-------------|-------------|
| Total Salaries                      |       |                   | \$1,546,070 |             |
| Labor Burden                        | 90.0% | of Total Salaries |             |             |
| <b>Overhead (\$M/y)</b>             |       |                   | <b>5.11</b> |             |
| Maintenance                         | 3.0%  | of FCI            | \$4,141,233 |             |
| Property Insur. & Tax               | 0.7%  | of FCI            | \$966,288   |             |
| <b>TOTAL OPERATING COST (\$M/y)</b> |       |                   |             | <b>59.8</b> |

**Table S14.** MSP breakdown for MPW-Hydrogen process.

| <b>MSP Breakdown (\$/kg)</b> |           |             |                    |             |                  |                   |         |             |
|------------------------------|-----------|-------------|--------------------|-------------|------------------|-------------------|---------|-------------|
| Process Area                 | Feedstock | Natural gas | Catalysts, BFW, CW | Electricity | Capital Recovery | Other Operational | Credits | Total       |
| Gasification                 | 2.06      | 0.13        | 0.10               | 0.00        | 0.07             | 0.02              | -0.10   | 2.29        |
| Syngas preparation           | 0.00      | 0.07        | 0.01               | 0.03        | 0.18             | 0.00              | 0.00    | 0.28        |
| Water-gas-shift              | 0.00      | 0.00        | 0.01               | 0.09        | 0.30             | 0.00              | -0.19   | 0.22        |
| Pressure swing adsorption    | 0.00      | 0.00        | 0.00               | 0.00        | 0.10             | 0.00              | 0.00    | 0.10        |
| OSBL                         | 0.00      | 0.00        | 0.00               | 0.00        | 0.16             | 0.35              | 0.00    | 0.51        |
| Total                        | 2.06      | 0.20        | 0.12               | 0.12        | 0.82             | 0.37              | -0.29   | <b>3.41</b> |

**Table S15.** CAPEX breakdown by process sections for MSW-Hydrogen process.

| Equipment name                 | Installation factor | Capital cost (2016\$) |                |
|--------------------------------|---------------------|-----------------------|----------------|
|                                |                     | Equipment cost        | Installed cost |
| Gasification                   |                     |                       |                |
| Fixed bed gasifier system      | 2.47                | 2,437,639             | 6,020,968      |
| Syngas knock-out pot           | 2.47                | 29,404                | 70,443         |
| BFW pump                       | 2.47                | 81,250                | 146,562        |
| HRSB-2                         | 2.47                | 120,181               | 216,786        |
| HRSB-1                         | 2.47                | 63,389                | 114,343        |
| HRSB-3                         | 2.47                | 50,079                | 90,334         |
| Balance of plant               |                     | 293,967               | 693,384        |
|                                |                     | 3.08M                 | 7.35M          |
| Syngas preparation             |                     |                       |                |
| Syngas compressor (1-stage)    | 1.80                | 1,360,168             | 2,448,303      |
| LO-CAT system                  | 2.61                | 1,082,436             | 2,825,159      |
| ZnO bed                        | 2.47                | 17,964                | 44,372         |
| SMR Product/Feed exchanger     | 2.47                | 43,220                | 106,754        |
| SMR feed heater                | 2.47                | 16,017                | 39,561         |
| Steam methane reformer         | 2.47                | 1,947,472             | 4,810,255      |
| High pressure syngas separator | 2.47                | 46,691                | 115,326        |
| Balance of plant               |                     | 451,397               | 1,038,973      |
|                                |                     | 4.97M                 | 11.43M         |
| Water-gas-shift                |                     |                       |                |
| Main compressor                | 1.8                 | 2,834,488             | 5,102,078      |
| CO2 removal system             | 2.61                | 673,246               | 1,757,172      |
| Steam turbine                  | 1.8                 | 3,365,844             | 6,160,296      |

|                                                    |      |              |               |
|----------------------------------------------------|------|--------------|---------------|
| BFW pump                                           | 2.47 | 45,231       | 111,720       |
| Water-gas-shift reactor                            | 2.47 | 16,770       | 41,421        |
| WGS HRSG                                           | 2.47 | 52,384       | 129,389       |
| Cooling water exchanger (for WGS reaction mixture) | 2.47 | 37,726       | 68,052        |
| Knock-Out Pot                                      | 2.47 | 25,692       | 63,459        |
| Balance of plant                                   |      | 705,138      | 1,343,359     |
|                                                    |      | <b>7.76M</b> | <b>14.78M</b> |
| <b>Pressure swing adsorption</b>                   |      |              |               |
| Pressure swing adsorption unit                     | 1.90 | 1,720,678    | 3,269,288     |
| Balance of plant                                   |      | 172,068      | 326,929       |
|                                                    |      | <b>1.89M</b> | <b>3.60M</b>  |
| Outside battery limit                              |      |              | 9,357,273     |
| Site development and piping                        |      |              | 8,187,614     |
| Total indirect costs                               |      |              | 32,984,388    |
| Land and working capital                           |      |              | 4,537,918     |
| <b>TOTAL CAPITAL INVESTMENT</b>                    |      |              | <b>92.5M</b>  |

**Table S16.** OPEX breakdown for MSW-Hydrogen process.

| Variable operating costs (\$M/y)     |           |               |              | 6.04 |
|--------------------------------------|-----------|---------------|--------------|------|
| Raw material/utility                 | Value     | Units         | \$M/y (2016) |      |
| Gasification                         |           |               |              |      |
| Oxygen                               | 2,085     | kg/h          | 1.08         |      |
| Natural gas usage                    | 7.9       | Gcal/h        | 0.73         |      |
| Cyclone and ESP operation            | 652,546   | ft³/h of gas  | 0.17         |      |
| BFW                                  | 37,300    | kg/h          | 0.09         |      |
| BFW pump                             | 76.8      | kW            | 0.03         |      |
| Tar reformer catalyst cost           | 2,682,176 | ft³/h of gas  | 0.03         |      |
| Tar reformer catalyst replenishment  |           |               | 0.54         |      |
| LPS credit (@\$5.7/mt)               | 15,098    | kg/h          | -0.68        |      |
| Wastewater treatment                 | 1,354     | kg/h          | 0.01         |      |
|                                      |           |               | 2.00         |      |
| Syngas preparation                   |           |               |              |      |
| Syngas compression                   | 907.8     | kW            | 0.31         |      |
| LO-CAT chemicals                     | 2         | kg/h          | 0.00         |      |
| ZnO bed catalyst                     | 317,091   | ft³/h of gas  | 0.00         |      |
| SMR catalyst                         | 1,394,272 | sft³/h of gas | 0.07         |      |
| BFW credit                           | 15852     | kg/h          | -0.04        |      |
|                                      |           |               | 0.35         |      |
| Water-gas-shift                      |           |               |              |      |
| Compression duty for main compressor | 2273.0    | kW            | 0.78         |      |
| Turbine electricity credit           | 4427.8    | kW            | -1.53        |      |
| BFW                                  | 6,321     | kg/h          | 0.01         |      |
| BFW Pump                             | 9.6       | kW            | 0.00         |      |
| Water gas shift catalyst             | 800,565   | sft³/h of gas | 0.04         |      |
| Raw hydrogen gas cooler              | 1.4       | Gcal/h        | 0.04         |      |
| BFW credit                           | 4,710     | kg/h          | -0.01        |      |
| CO₂ separation                       | 9,729     | kg/h          | 3.23         |      |
|                                      |           |               | 2.58         |      |
| Fixed operating cost (\$M/y)         |           |               |              | 6.19 |
| Labor and supervision (\$M/y)        |           |               | 2.94         |      |

| Position                            | Salary (2016) | # Required        | Total Cost (2016) |             |
|-------------------------------------|---------------|-------------------|-------------------|-------------|
| Plant Manager                       | \$164,452     | 1                 | \$164,452         |             |
| Plant Engineer                      | \$78,310      | 1                 | \$78,310          |             |
| Maintenance Supr                    | \$63,767      | 1                 | \$63,767          |             |
| Maintenance Tech                    | \$44,749      | 6                 | \$268,493         |             |
| Lab Manager                         | \$62,648      | 1                 | \$62,648          |             |
| Lab Technician                      | \$44,749      | 1                 | \$44,749          |             |
| Shift Supervisor                    | \$53,699      | 3                 | \$161,096         |             |
| Shift Operators                     | \$44,749      | 12                | \$536,985         |             |
| Yard Employees                      | \$31,324      | 4                 | \$125,297         |             |
| Clerks & Secretaries                | \$40,274      | 1                 | \$40,274          |             |
| Total Salaries                      |               |                   | \$1,546,070       |             |
| Labor Burden                        | 90.0%         | of Total Salaries |                   |             |
| <b>Overhead (\$M/y)</b>             |               |                   | <b>3.25</b>       |             |
| Maintenance                         | 3.0%          | of FCI            | \$2,638,751       |             |
| Property Insur. & Tax               | 0.7%          | of FCI            | \$615,709         |             |
| <b>TOTAL OPERATING COST (\$M/y)</b> |               |                   |                   | <b>12.2</b> |

**Table S17.** MSP breakdown for MSW-Hydrogen process.

| <b>MSP Breakdown (\$/kg)</b> |           |             |                    |             |                  |                   |         |             |
|------------------------------|-----------|-------------|--------------------|-------------|------------------|-------------------|---------|-------------|
| Process area                 | Feedstock | Natural gas | Catalysts, BFW, CW | Electricity | Capital Recovery | Other Operational | Credits | Total       |
| Gasification                 | 0.15      | 0.10        | 0.09               | 0.00        | 0.13             | 0.17              | -0.09   | 0.55        |
| Syngas preparation           | 0.00      | 0.00        | 0.01               | 0.04        | 0.20             | 0.00              | 0.00    | 0.24        |
| Water-gas-shift              | 0.00      | 0.00        | 0.01               | 0.11        | 0.25             | 0.44              | -0.21   | 0.60        |
| Pressure swing adsorption    | 0.00      | 0.00        | 0.00               | 0.00        | 0.06             | 0.00              | 0.00    | 0.06        |
| OSBL                         | 0.00      | 0.00        | 0.00               | 0.00        | 0.95             | 0.83              | 0.00    | 1.78        |
| Total                        | 0.15      | 0.10        | 0.11               | 0.15        | 1.59             | 1.44              | -0.30   | <b>3.24</b> |

**Table S18.** Material Flows through Industry (MFI) analysis results for MPW-Methanol and MSW-Methanol cases.

| <b>METHANOL</b>                      |                      |             |            |                                         |                                  |
|--------------------------------------|----------------------|-------------|------------|-----------------------------------------|----------------------------------|
|                                      | Fossil-fuel methanol | MPW         | MSW        | MSW (with credit for avoiding landfill) | Unit                             |
| <b>TOTAL SUPPLY CHAIN ENERGY</b>     | <b>37.0</b>          | <b>17.8</b> | <b>9.9</b> |                                         | MJ/kg methanol                   |
| Process Fuel                         | 6.1                  | 12.3        | 3.7        |                                         | MJ/kg methanol                   |
| Fuel for Electricity                 | 0.3                  | 4.3         | 5.2        |                                         | MJ/kg methanol                   |
| Renewable Electricity                | 0.0                  | 0.3         | 0.4        |                                         | MJ/kg methanol                   |
| Fuel for Transportation              | 0.7                  | 0.4         | 0.5        |                                         | MJ/kg methanol                   |
| Fuel as Chemical Feedstocks          | 29.8                 | 0.5         | 0.1        |                                         | MJ/kg methanol                   |
| GHG - Process Fuel                   | 0.3                  | 0.8         | 1.3        | 1.3                                     | kg CO <sub>2e</sub> /kg methanol |
| GHG - Electricity Generation         | 0.0                  | 0.3         | 0.4        | 0.4                                     | kg CO <sub>2e</sub> /kg methanol |
| GHG - Transportation                 | 0.1                  | 0.0         | 0.0        | 0.0                                     | kg CO <sub>2e</sub> /kg methanol |
| GHG - After applying landfill credit |                      |             |            | -2.6                                    | kg CO <sub>2e</sub> /kg methanol |
| <b>TOTAL GHG</b>                     | <b>0.4</b>           | <b>1.1</b>  | <b>1.7</b> | <b>-0.9</b>                             | kg CO <sub>2e</sub> /kg methanol |

**Table S19.** Material Flows through Industry (MFI) analysis results for MPW-Hydrogen and MSW-Hydrogen cases.

| <b>HYDROGEN</b>                      |                      |             |             |                                         |                                  |
|--------------------------------------|----------------------|-------------|-------------|-----------------------------------------|----------------------------------|
|                                      | Fossil-fuel hydrogen | MPW         | MSW         | MSW (with credit for avoiding landfill) | Unit                             |
| <b>TOTAL SUPPLY CHAIN ENERGY</b>     | <b>174.3</b>         | <b>75.8</b> | <b>31.2</b> |                                         | MJ/kg hydrogen                   |
| Process Fuel                         | 156.5                | 76.6        | 32.7        |                                         | MJ/kg hydrogen                   |
| Fuel for Electricity                 | 4.1                  | -4.1        | -3.6        |                                         | MJ/kg hydrogen                   |
| Renewable Electricity                | 0.3                  | -0.2        | -0.3        |                                         | MJ/kg hydrogen                   |
| Fuel for Transportation              | 3.2                  | 1.5         | 2.3         |                                         | MJ/kg hydrogen                   |
| Fuel as Chemical Feedstocks          | 10.2                 | 2.0         | 0.0         |                                         | MJ/kg hydrogen                   |
| GHG - Process Fuel                   | 8.8                  | 12.9        | 15.7        | 15.7                                    | kg CO <sub>2e</sub> /kg hydrogen |
| GHG - Electricity Generation         | 0.3                  | -0.4        | -0.3        | -0.3                                    | kg CO <sub>2e</sub> /kg hydrogen |
| GHG - Transportation                 | 0.3                  | 0.1         | 0.2         | 0.2                                     | kg CO <sub>2e</sub> /kg hydrogen |
| GHG - After applying landfill credit |                      |             |             | -13.1                                   | kg CO <sub>2e</sub> /kg hydrogen |
| <b>TOTAL GHG</b>                     | <b>9.4</b>           | <b>12.8</b> | <b>15.6</b> | <b>2.6</b>                              | kg CO <sub>2e</sub> /kg hydrogen |

**Table S20.** LCA results for MPW-Methanol and MPW-Hydrogen processes compared to their fossil-fuel counterparts.

|                              | <i>Impact category</i>      |                            |                          |                             |                                  |                              |                                   |                            |                                |                            |                      |
|------------------------------|-----------------------------|----------------------------|--------------------------|-----------------------------|----------------------------------|------------------------------|-----------------------------------|----------------------------|--------------------------------|----------------------------|----------------------|
|                              | <b>Acidif-<br/>ication</b>  | <b>Carcin-<br/>ogenics</b> | <b>Eco-<br/>toxicity</b> | <b>Eutro-<br/>phication</b> | <b>Fossil fuel<br/>depletion</b> | <b>Global<br/>warming</b>    | <b>Non<br/>carcin-<br/>ogenic</b> | <b>Ozone<br/>depletion</b> | <b>Respiratory<br/>effects</b> | <b>Smog</b>                | <b>Water<br/>use</b> |
|                              | kg SO <sub>2</sub><br>eq/kg | CTUh/kg                    | CTUe/kg                  | kg N<br>eq/kg               | MJ<br>surplus/kg                 | kg CO <sub>2</sub><br>eq./kg | CTUh/kg                           | kg CFC-<br>11/kg           | kg PM2.5<br>eq/kg              | kg O <sub>3</sub><br>eq/kg | m <sup>3</sup> /kg   |
| <i>MPW-methanol</i>          |                             |                            |                          |                             |                                  |                              |                                   |                            |                                |                            |                      |
| <b>TOTAL</b>                 | <b>0.0017</b>               | <b>3.13E-8</b>             | <b>6.66</b>              | <b>0.0032</b>               | <b>0.85</b>                      | <b>0.736</b>                 | <b>1.52E-7</b>                    | <b>1.34E-7</b>             | <b>0.0010</b>                  | <b>-0.0058</b>             | <b>5.24</b>          |
| <b>Standard deviation</b>    | <b>0.0008</b>               | <b>1.86E-8</b>             | <b>3.29</b>              | <b>0.0018</b>               | <b>0.441</b>                     | <b>0.118</b>                 | <b>1.14E-7</b>                    | <b>7.60E-8</b>             | <b>0.0002</b>                  | <b>0.0051</b>              | <b>3.73</b>          |
| Process emissions            | 0                           | 0                          | 0.138                    | 0                           | 0                                | 1.07                         | 5.5E-10                           | 0                          | 2.68E-8                        | 6.8E-5                     | 0                    |
| Cooling water                | 3.96E-6                     | 2.04E-10                   | 0.015                    | 3.36E-6                     | 0.0009                           | 0.0009                       | 4.3E-10                           | 8.08E-11                   | 1.21E-6                        | 5.7E-5                     | 4.98                 |
| Boiler feed water            | 2.08E-7                     | 1.07E-11                   | 7.82E-4                  | 1.76E-7                     | 4.97E-5                          | 4.94E-5                      | 2.3E-11                           | 4.23E-12                   | 6.33E-8                        | 3.0E-6                     | 0.26                 |
| Natural gas                  | 0.0033                      | 4.66E-9                    | 0.614                    | 0.0002                      | 1.915                            | 0.0984                       | 2.34E-8                           | 1.75E-7                    | 0.0003                         | 0.0055                     | 0.007                |
| MPW feedstock                | 0.00037                     | 6.13E-9                    | 3.50                     | 0.0012                      | 0.2613                           | 0.0710                       | 6.68E-8                           | 2.99E-8                    | 0.00014                        | 0.0043                     | 0.016                |
| Catalysts                    | 9.63E-5                     | 4.58E-9                    | 0.588                    | 0.0001                      | 0.0057                           | 0.0239                       | 2.53E-8                           | 6.08E-10                   | 3.05E-5                        | 0.0009                     | 0.001                |
| Infrastructure               | 3.83E-8                     | 1.28E-12                   | 0.0003                   | 5.34E-8                     | 3.26E-6                          | 4.34E-6                      | 1.1E-11                           | 3.11E-13                   | 9.06E-9                        | 2.93E-7                    | 1.2E-6               |
| Electricity                  | 0.0011                      | 2.37E-8                    | 2.70                     | 0.0024                      | 0.0230                           | 0.302                        | 8.08E-8                           | 3.21E-8                    | 0.0009                         | 0.0077                     | 0.050                |
| Steam (co-product)           | -0.003                      | -1.2E-8                    | -1.14                    | -0.008                      | -1.56                            | -0.832                       | -5.0E-8                           | -1.0E-7                    | -0.0003                        | -0.024                     | -0.044               |
| Ash disposal                 | 6.72E-7                     | 4.00E-9                    | 0.216                    | 1.52E-5                     | 0.0002                           | 0.0002                       | 1.55E-9                           | 1.62E-11                   | 1.06E-7                        | 1.20E-5                    | 3.5E-5               |
| Wastewater                   | 4.91E-6                     | 1.68E-10                   | 0.0127                   | 3.11E-5                     | 0.0005                           | 0.0006                       | 2.99E-9                           | 4.21E-11                   | 9.39E-7                        | 4.83E-5                    | -0.04                |
| <i>MPW-hydrogen</i>          |                             |                            |                          |                             |                                  |                              |                                   |                            |                                |                            |                      |
| <b>TOTAL</b>                 | <b>0.0091</b>               | <b>9.70E-9</b>             | <b>15.6</b>              | <b>-2.51E-5</b>             | <b>7.18</b>                      | <b>10.8</b>                  | <b>2.61E-7</b>                    | <b>8.16E-7</b>             | <b>-0.00076</b>                | <b>-0.047</b>              | <b>8.42</b>          |
| <b>Standard deviation</b>    | <b>0.0049</b>               | <b>8.46E-9</b>             | <b>10.5</b>              | <b>0.0004</b>               | <b>2.34</b>                      | <b>0.456</b>                 | <b>2.96E-7</b>                    | <b>4.93E-7</b>             | <b>0.0007</b>                  | <b>0.0202</b>              | <b>8.31</b>          |
| Process emissions            | 0                           | 0                          | 0                        | 0                           | 0                                | 13.5                         | 0                                 | 0                          | 1.36E-7                        | 0.0003                     | 0                    |
| Cooling water                | 5.98E-6                     | 3.09E-10                   | 0.0226                   | 5.08E-6                     | 0.0014                           | 0.0014                       | 6.5E-10                           | 1.22E-10                   | 1.82E-6                        | 8.61E-5                    | 7.53                 |
| Boiler feed water            | 9.18E-7                     | 4.74E-11                   | 0.0035                   | 7.79E-7                     | 0.0002                           | 0.0002                       | 1.0E-10                           | 1.87E-11                   | 2.80E-7                        | 1.32E-5                    | 1.16                 |
| Natural gas                  | 0.0212                      | 2.99E-8                    | 3.94                     | 0.0010                      | 12.26                            | 0.630                        | 1.50E-7                           | 1.12E-6                    | 0.0016                         | 0.0353                     | 0.042                |
| MPW feedstock                | 0.00188                     | 3.11E-8                    | 17.7                     | 0.0006                      | 1.32                             | 0.360                        | 3.39E-7                           | 1.51E-7                    | 0.0007                         | 0.0220                     | 0.080                |
| Catalysts                    | 0.00047                     | 2.26E-8                    | 2.65                     | 0.0005                      | 0.028                            | 0.121                        | 1.13E-7                           | 3.05E-9                    | 0.0002                         | 0.0042                     | 0.007                |
| Infrastructure               | 1.95E-7                     | 6.51E-12                   | 0.0013                   | 2.72E-7                     | 1.66E-5                          | 2.21E-5                      | 5.8E-11                           | 1.58E-12                   | 4.62E-8                        | 1.49E-6                    | 6.0E-6               |
| Steam (co-product)           | -0.0122                     | -4.6E-8                    | -4.33                    | -0.0029                     | -5.96                            | -3.17                        | -1.9E-7                           | -4.0E-7                    | -0.001                         | -0.093                     | -0.166               |
| Electricity (co-product)     | -0.0023                     | -4.9E-8                    | -5.58                    | -0.0051                     | -0.475                           | -0.634                       | -1.7E-7                           | -6.6E-8                    | -0.002                         | -0.016                     | -0.104               |
| Ash disposal                 | 3.40E-6                     | 2.03E-8                    | 1.09                     | 7.71E-5                     | 0.0008                           | 0.0013                       | 7.85E-9                           | 8.20E-11                   | 5.37E-7                        | 6.10E-5                    | 0.0002               |
| Wastewater                   | 1.58E-5                     | 5.39E-10                   | 0.041                    | 9.98E-5                     | 0.0016                           | 0.0018                       | 9.58E-9                           | 1.35E-10                   | 3.01E-6                        | 0.0002                     | -0.126               |
| <i>Fossil-based methanol</i> |                             |                            |                          |                             |                                  |                              |                                   |                            |                                |                            |                      |
| <b>TOTAL</b>                 | <b>0.0057</b>               | <b>1.98E-8</b>             | <b>3.94</b>              | <b>0.00117</b>              | <b>4.81</b>                      | <b>0.576</b>                 | <b>1.56E-7</b>                    | <b>2.16E-7</b>             | <b>0.000572</b>                | <b>0.0301</b>              | <b>0.19</b>          |
| <b>Standard deviation</b>    | <b>0.0017</b>               | <b>1.78E-8</b>             | <b>3.06</b>              | <b>0.00064</b>              | <b>0.909</b>                     | <b>0.078</b>                 | <b>1.74E-7</b>                    | <b>9.56E-8</b>             | <b>0.000125</b>                | <b>0.0045</b>              | <b>1.28</b>          |
| <i>Fossil-based hydrogen</i> |                             |                            |                          |                             |                                  |                              |                                   |                            |                                |                            |                      |
| <b>TOTAL</b>                 | <b>0.00693</b>              | <b>6.32E-8</b>             | <b>6.68</b>              | <b>0.00299</b>              | <b>10.4</b>                      | <b>9.61</b>                  | <b>2.41E-7</b>                    | <b>3.61E-7</b>             | <b>0.00163</b>                 | <b>0.0867</b>              | <b>2.0</b>           |
| <b>Standard deviation</b>    | <b>0.00045</b>              | <b>4.67E-8</b>             | <b>4.55</b>              | <b>0.00143</b>              | <b>0.053</b>                     | <b>0.285</b>                 | <b>2.05E-7</b>                    | <b>9.18E-8</b>             | <b>0.00018</b>                 | <b>0.0039</b>              | <b>6.7</b>           |



**Table S21.** Heat duties of all major heat transfer equipment. Refer to **Fig. S13-S26** for respective PFDs.

| Tag | Heat duty, Gcal/h | Tag | Heat duty, Gcal/h |
|-----|-------------------|-----|-------------------|
| Q1  | 29.18             | Q19 | -3.62             |
| Q2  | 18.59             | Q20 | -0.13             |
| Q3  | -7.86             | Q21 | -3.66             |
| Q4  | 20.50             | Q22 | 7.75              |
| Q5  | -7.67             | Q23 | 9.36              |
| Q6  | -0.28             | Q24 | 1.04              |
| Q7  | -16.99            | Q25 | -0.12             |
| Q8  | 31.07             | Q26 | -0.53             |
| Q9  | 27.48             | Q27 | 0.13              |
| Q10 | -0.41             | Q28 | -0.09             |
| Q11 | -1.86             | Q29 | 1.70              |
| Q12 | 0.44              | Q30 | -1.25             |
| Q13 | -0.32             | Q31 | 3.37              |
| Q14 | 1.70              | Q32 | 25.68             |
| Q15 | -3.85             | Q33 | 5.34              |
| Q16 | 11.43             | Q34 | 4.87              |
| Q17 | -6.07             | Q35 | 1.39              |
| Q18 | 6.53              |     |                   |

### S3. MPW-Methanol process

When mixed plastic waste and municipal solid waste gasification pathways are to be compared with commercial benchmarks, the difference in the process lies only in the initial upstream part of the process, up to the syngas generation step as shown in the example of a methanol process in **Fig. S12**. Once the syngas is produced in the desired  $H_2/CO$  ratio (2 for methanol) and the catalyst poisons and particulates are removed, the downstream processing remains the same for all processes irrespective of the gasification feedstock. However, syngas is not a traded commodity and hence a market price of syngas for different  $H_2/CO$  ratios is not available. Some studies have estimated a syngas price<sup>9,10</sup> but they are only applicable to the respective studies to compare the performance of different pathways. Hence, for a fair comparison, the processes have been modeled until the final production of methanol and hydrogen, and the market price of the final products<sup>11</sup> is compared with the minimum selling price (MSP) of the MPW and MSW-based processes.

The conventional methanol production process from natural gas<sup>12</sup> has been modified to handle an unconventional feedstock like MPW. A simple steam reformer in NG-based plants is replaced by a gasification unit with a combustion reactor that can handle solid feedstock.

**Gasification & gas clean-up.** The first section in the MPW-Methanol process involves gasification and gas-clean-up and the process flow diagram (PFD) is shown in **Fig. S13**. The indirect gasification design is suitable here since the steam gasification of waste plastics is endothermic, and the circulating olivine provides the energy to drive the gasification reactions. Four streams are combusted in the combustion reactor to supply energy to the gasification reactor, namely (1) char from the gasification reactor, (2) purge stream from the methanol synthesis recycle loop which contains  $H_2$ ,  $CO$ , and methanol, (3) top vapor from the light ends distillation column which contains methanol,  $H_2$ , and dimethyl ether, and (4) importing natural gas. The gasification reactor temperature of  $834^\circ C$  was maintained by adjusting the NG import flow rate. Around 48% of the energy was supplied by importing natural gas in the base case. The hot olivine from the combustion reactor provides the heat to the gasification reactor and is then circulated back to the combustion reactor by solid handling equipment. This design is similar to a continuous catalyst regenerator (CCR) in a refinery<sup>13</sup>.

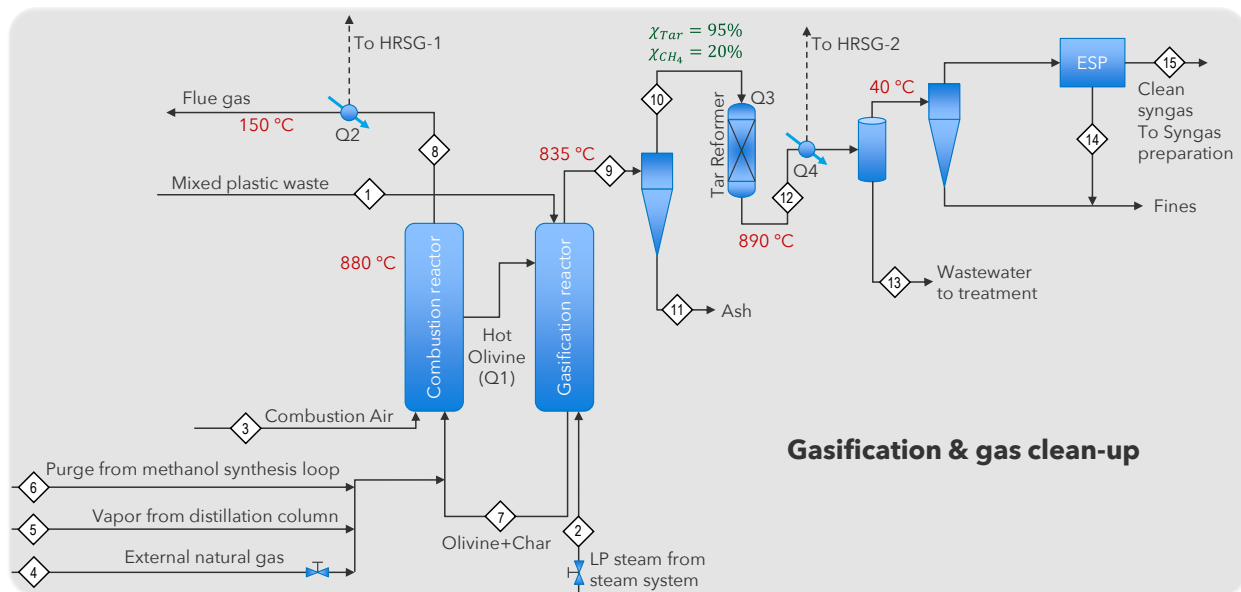

**Fig. S13.** Gasification and gas clean-up PFD for MPW-Methanol process. Refer to Table S12 for heat transfer duties.

The syngas yield is a function of the solid feedstock, gasification agent (steam/oxygen), and syngas composition. The MPW syngas yields are more than MSW syngas yields, with all other parameters remaining the same since the volatile fraction is higher in MPW. Syngas yield is an important parameter that has a strong influence on process economics for MPW.

Based on the experimental results of Wilk and Hofbauer<sup>1</sup>, the carbon in the mixed plastic waste ends up in different phases: 82% in the gas phase as CO, CO<sub>2</sub>, CH<sub>4</sub>, C<sub>2</sub>H<sub>4</sub>, C<sub>3</sub>H<sub>8</sub>, 5% in tar<sup>1</sup>, 12% in char, and 0.4% in ash. As expected for steam gasification<sup>14</sup>, the H<sub>2</sub>/CO ratio is high at about 2.14 and is close to the required stoichiometric ratio required for methanol synthesis of 2.

The raw syngas is passed through a cyclone to remove particulates and is then fed into a tar reformer. The tar reformer converts large fused aromatic hydrocarbons like naphthalene to H<sub>2</sub> and CO thereby enhancing syngas yield. Naphthalene (C<sub>10</sub>H<sub>8</sub>) was used as the model compound for tar<sup>1</sup>. However, the tar reformer catalyst is designed to maximize tar conversions, and hence the conversion of light hydrocarbon gases such as methane is low. Therefore, an additional steam reformer is needed further downstream to convert light gases to syngas.

In the current model, even after tar reforming, the syngas stream has a tar concentration of 938 mg/Nm<sup>3</sup>. The allowable tar content for Fischer-Tropsch synthesis is <1 mg/Nm<sup>3</sup><sup>15</sup>. This value can be used as a benchmark for other catalytic synthesis pathways. Hence, even after tar reforming, the amount of tar remaining in the gas stream must be reduced. Thus, the cyclone and electrostatic precipitator (ESP) combination is used after the tar reformer for particulate control.

The process is well integrated in terms of heat and material balance. Though a pinch analysis was not carried out, all the major pinch analysis guidelines were followed in the design of the heat exchanger network (HEN). A temperature approach of 15 °C was used in the design of the HEN. As the temperature of the gasifier and steam reformer is in the range of 750-850 °C, and the methanol process make-up gas compressor has a large electricity demand, there is an opportunity for co-generation to reduce the electricity demand as well as satisfy steam demand. **Fig. S11** shows the two-tier steam system used in the MPW-Methanol process. A similar design has been used in all the processes studied with small variations.

The steam system has two headers operating at different pressures. Medium pressure steam (400 °C, 45 bar) is produced in the Heat Recovery Steam Generators (HRSGs) by heat coming from Tar Reformer Outlet, Steam Reformer Outlet, and Char Combustor Flue-gas. The flow rates of BFW are adjusted so the final steam has the same pressure and temperature of 45 bar and 400 °C respectively. All the steam is mixed and runs a turbine to generate electricity. The outlet pressure of the Turbine is fixed at 3 bar, the pressure that is required for the steam reformer. The same Low Pressure (LP) steam is used in the steam reformer as well as reboilers in the distillation columns.

**Modeling the gasifier.** The simulation step involves base case simulation in ASPEN Plus for the selected process pathways. Specifically for the gasification reactor, non-conventional components have to be used to characterize the solid feeds, Mixed Plastic Waste, and Municipal Solid Waste. Hence the methodology followed is described here for the Mixed Plastic Waste case. The input data is in the form of Proximate and Ultimate Analysis. The Ultimate Analysis input in ASPEN Plus should be on a dry basis. The additional input needed is the heat of combustion that is specified as “HCOMB” in Properties > Methods > Parameters > Pure Components > Heat. The inbuilt example of solid2.bkp from ASPEN Plus Examples “Getting Started with Solids” was used as a starting point to set up the simulation. The gasification reaction is modeled by using two hypothetical reactors in series. This is done to convert the non-conventional components to elemental composition in the first reactor (DECOMP in ASPEN Plus example). The conversion of the elements to the final syngas composition is carried out in the second reactor and is controlled with the help of an RYIELD block (Yield reactor model in ASPEN Plus). Since both the reactors are simulating a single reactor, they are heat-connected with a heat stream going from the first to the second reactor, which removes a degree of freedom but closely resembles the actual conditions of the gasification reactor. The second reactor is modeled as an RYIELD block where the gasification reaction information is the input.

The mass yields are calculated based on the experimental set of data and are shown in **Table S1**. To make the model more dynamic to syngas yields, a simple formula was deduced so that the gas yields change as per the syngas yields. This was important since the syngas yield is a parameter that was varied later in the sensitivity analyses, and it is hence essential that the gas/solid distributions change as the syngas yield is changed. The yield of each gas is an input in the ASPEN model. The yield is defined as mass of the gas produced per kg of total input (MPW + steam). Based on this definition, and the mass balance shown in **Table S1**, the following equation is obtained. The equation is used in the ASPEN model to calculate yield of a specific gas in the model based on the experimental data:

$$Y_{\text{gas}} = \frac{0.00044642 \times MW_{\text{gas}} \times \dot{m}_{\text{MPW}} \times Y_{\text{syngas}} \times X_{\text{gas}}}{(\dot{m}_{\text{MPW}} + \dot{m}_{\text{Steam}})}$$

$MW_{\text{gas}} \rightarrow \frac{\text{g}}{\text{mol}}$   
 $\dot{m}_{\text{MPW}} + \dot{m}_{\text{Steam}} \rightarrow \text{kg/h}$   
 $Y_{\text{syngas}} \rightarrow \text{Syngas yield in Nm}^3/\text{kg}$   
 $X_{\text{gas}} \rightarrow \text{Composition of gas in gasifier outlet in \%}$

**Syngas yield for gasification process on mass basis.** To compare the performance of different gasification feedstocks using different plastics, it is important to use a consistent scale to measure the efficiency of gasification processes. Reports in the literature<sup>6,14</sup> sometimes use Nm<sup>3</sup>/kg (syngas volumetric flow/solid feedstock) for comparison of different processes. The problem with using these units is that some gasification processes may produce more light hydrocarbons (CH<sub>4</sub> and C<sub>2</sub>H<sub>6</sub>) than CO and H<sub>2</sub>, which reduces the volumetric flow rate of syngas (by a reduction in the number of moles). CH<sub>4</sub> or C<sub>2</sub>H<sub>6</sub> in the gasifier outlet does not necessarily affect the process economics. Because there are two more opportunities downstream of the gasifier for reforming (tar reforming and steam reforming), the hydrocarbons are eventually converted to syngas. Hence, the mass yield approach (kg syngas/kg solid feedstock) that is used in this study normalizes the effect of product distribution of different gases in the syngas and is a better metric than Nm<sup>3</sup>/kg to compare different gasification technologies. Any reduction in the mass yield indicates the loss of solid feedstock as a solid residue which directly impacts process economics. The H<sub>2</sub>/CO ratio in the syngas should also be specified when comparing different gasification processes.

**Table S22.** Energy balance for gasification reactor

| Stream enthalpy in, Gcal/h | Stream enthalpy out, Gcal/h |
|----------------------------|-----------------------------|
| Feed stream, -10.88        | Products, -44.4             |
| Steam, -62.66              |                             |
| Total In: -73.54           | Total out: -44.4            |

$$\Delta H_{\text{r,gasification}} = H_{\text{products}} - H_{\text{reactants}} = -44.38 + 73.54 = 29.14 \text{ Gcal/h}$$

**Energy balance around gasifier.** Table S22 shows the energy balance around the gasification reactor. The enthalpy,  $\Delta H$  of all the reactions happening inside the reactor is +29.14 Gcal/h (12.19 MJ/kg plastic feed). The positive value is expected since mixed plastic waste gasification is endothermic and needs energy to proceed, and this is the same energy that is input into the gasifier by the combustion reactor. The heat of reaction value can be compared to the heat of reactions for other steam reforming of hydrocarbon reactions (methane 12.89 MJ/kg, ethane 11.55 MJ/kg, propane 9.86 MJ/kg).

**Syngas preparation.** After particulate removal, syngas conditioning involves sulfur removal and steam methane reforming, as shown in Fig. S14. The sulfur content in MPW is 50 ppm. Hence, bulk sulfur removal was not necessary. Only one ZnO bed has been considered in the design, which can reduce the sulfur in the syngas down to 1 ppm<sup>16</sup>.

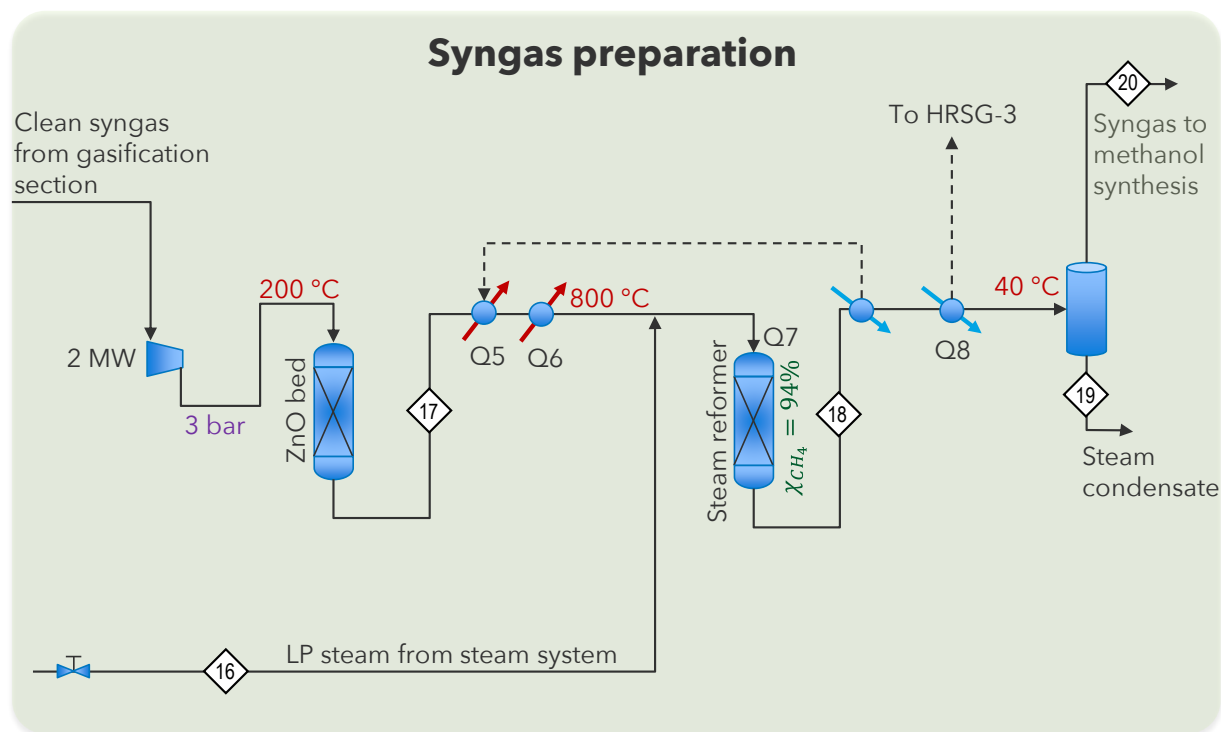

**Fig. S14.** Syngas preparation PFD for MPW-Methanol process. Refer to Table S12 for heat transfer duties.

After sulfur removal, the syngas is passed over a Ni catalyst in a fixed bed steam reformer. The operating pressure of the steam reformer is 3 bar, lower than the conventional 20-25 bar used in industry<sup>4</sup> to enhance methane conversion rates in the reformer. In our conceptual process design, the steam reformer comes after the gasification reactor and tar reformer. Hence the syngas already has a high concentration of CO and H<sub>2</sub> (almost 80%). Natural gas steam reforming systems do not face this problem as the feed gas to the reformer contains no CO and H<sub>2</sub> and the equilibrium easily shifts forward resulting in very high methane conversions. But in the MPW-Methanol process, the reformer feed already contains high concentrations of CO and H<sub>2</sub> and at 20 bar pressure, the equilibrium shifts backward in the steam reforming reaction due to Le Chatelier's principle, thereby lowering methane conversion rates. Hence, a lower pressure is more suitable in this case which is also in line with patent literature<sup>6</sup> on the MSW gasification process considered in this study. However, the choice of a lower pressure comes at the cost of an increase in the compression duty of the make-up gas compressor upstream of the methanol synthesis reactor.

**Methanol synthesis loop.** After reforming, the syngas is injected into the 'Synthesis loop'. The make-up gas compressor increases the pressure from about 3 bar to 80 bar as shown in **Fig. S15**. The methanol-to-dimethyl ether (DME) reaction has been added to simulate the production of the lighter side products. The methanol process uses a recycle loop configuration<sup>12</sup> due to low single-pass conversions of about 40%. A recycle gas compressor (RGC) maintains circulation flow of the unreacted syngas within the loop. A purge stream ensures there is no accumulation of inerts in the loop. The main inerts in the loop are unconverted methane and ethane. The purge fraction was set at 15%.

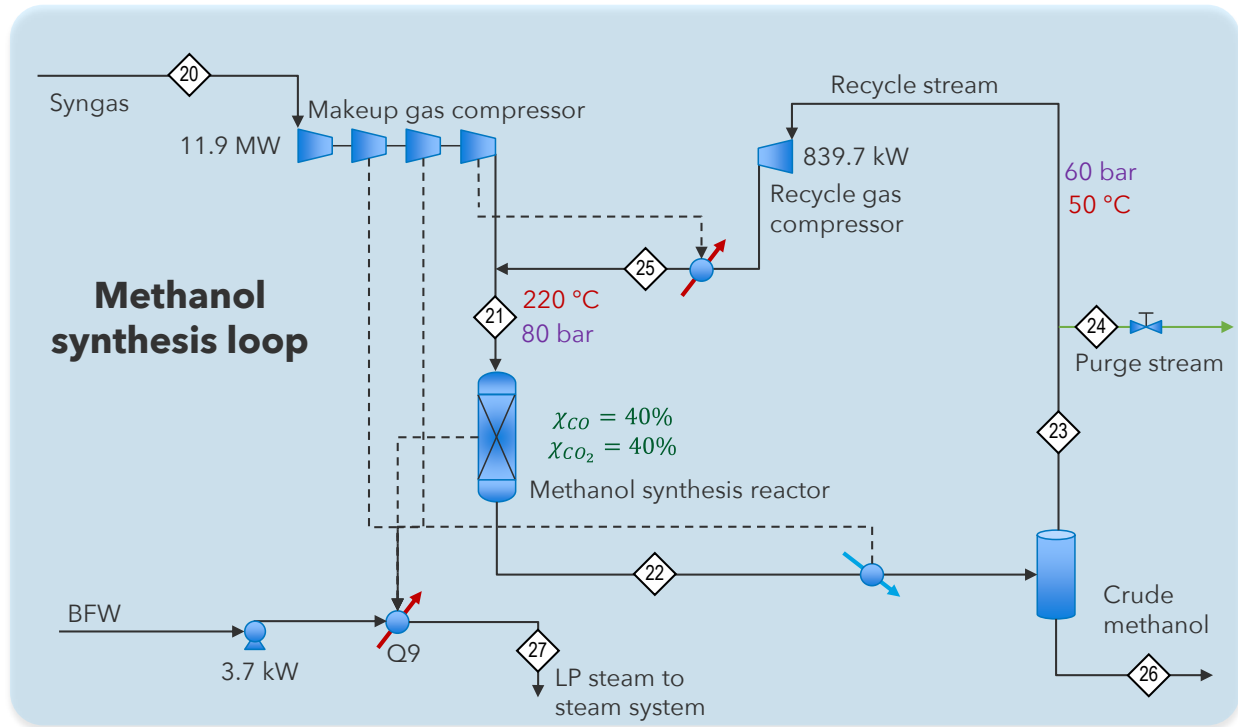

**Fig. S15.** Methanol synthesis loop PFD for MPW-Methanol process

A sensitivity analysis was performed to study the effect of the purge split fraction on the mole fraction of the inlet stream. As shown in **Fig. S16**, as the purge fraction is increased, the amount of purge stream increases resulting in a slight increase in reactant concentration in the MeOH reactor feed (green line). This is good from a kinetic perspective, but the negative impact is in the decrease of final methanol product production. Due to the material loss of reactants from the loop (CO, CO<sub>2</sub>, H<sub>2</sub>), methanol production decreases. However, for all cases, the reactants' mole fraction is consistently above 90%. Hence, a different approach was used to fix the split ratio.

The purge stream is used as fuel in the combustion reactor in gasification section. Hence, a low split fraction indicates the need to use external fuel to be used in the combustion reactor. On the other hand, a high split fraction results in reduction of methanol production rate (indicated by the blue line). Hence, an intermediate value of 0.15 was chosen for the split fraction. At this value of split fraction, the methanol production rate is about 354 MT/D. The split fraction will be a sensitivity variable that will be varied to study the impact on the overall process and MSP of methanol product.

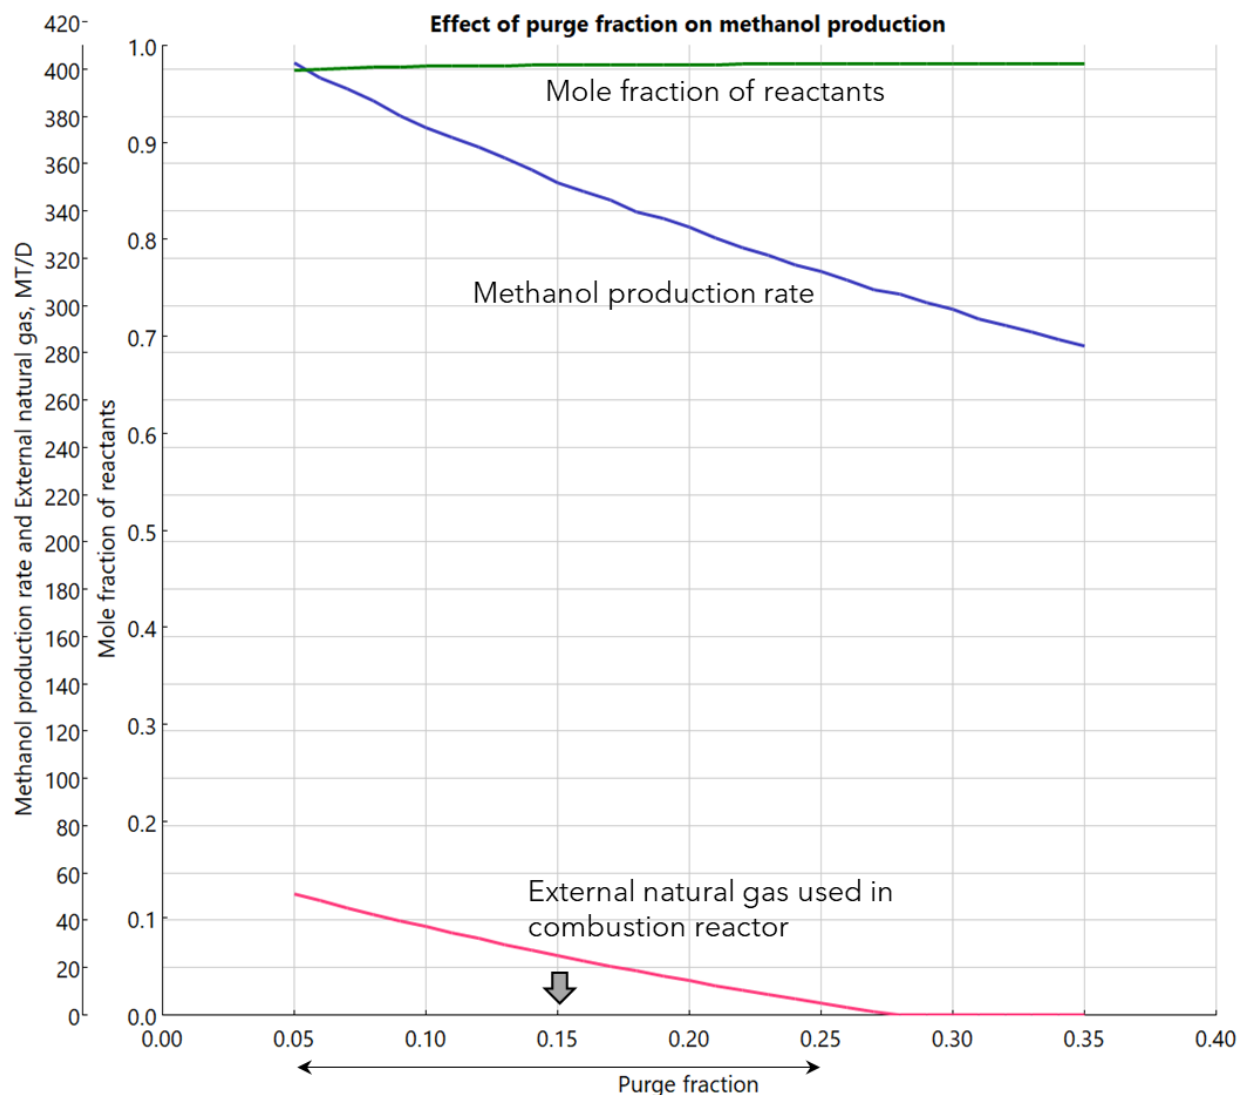

Fig. S16. Effect of purge split fraction on import natural gas

**Methanol distillation.** The distillation section is designed based on the purity required for different applications<sup>17</sup>: fuel, solvent, or chemical synthesis. In our design, we have considered chemical synthesis application and set the desired purity to 99.8%. Accordingly, two distillation columns were needed for the separation as shown in Fig. S17. For very high methanol capacities above 5000 MT/D, three or four columns in series may be required<sup>18</sup>.

The boiling point of methanol is 65 °C, an intermediate value between the side products like DME (b.p. -24 °C) and water (100 °C). The separation section helps increase the purity from about 75% to 99.8% by removing DME as the top product in the first column and water as the product in the second column. Two design specs have been used in the ASPEN Plus model to ensure the required product quality for methanol and maximize methanol recovery. In the first distillation column, the pressure is lowered to 11 bar and all gases from the top, which mainly contain methanol, H<sub>2</sub>, and DME are routed to the gasification section for combustion and energy recovery. The bottom product in the first column is distilled in a second column and 99.8% methanol is recovered from the top of the column. The water collected at the bottom of the heavy ends distillation column has some methanol in it and is routed to wastewater treatment.

After the base case simulation was completed, the simulation results were imported into a custom-built excel sheet where the equipment was sized, and their operating expenditures (OPEX) and capital expenditures (CAPEX) were estimated. Once the techno-economic analysis (TEA) was complete, a minimum selling price (MSP) for the product was estimated based on discounted cash flow rate of return (DCFROR) analysis. Economic assumptions include a 2016 cost year basis, 90% onstream time, 10% IRR, and 21% tax rate.

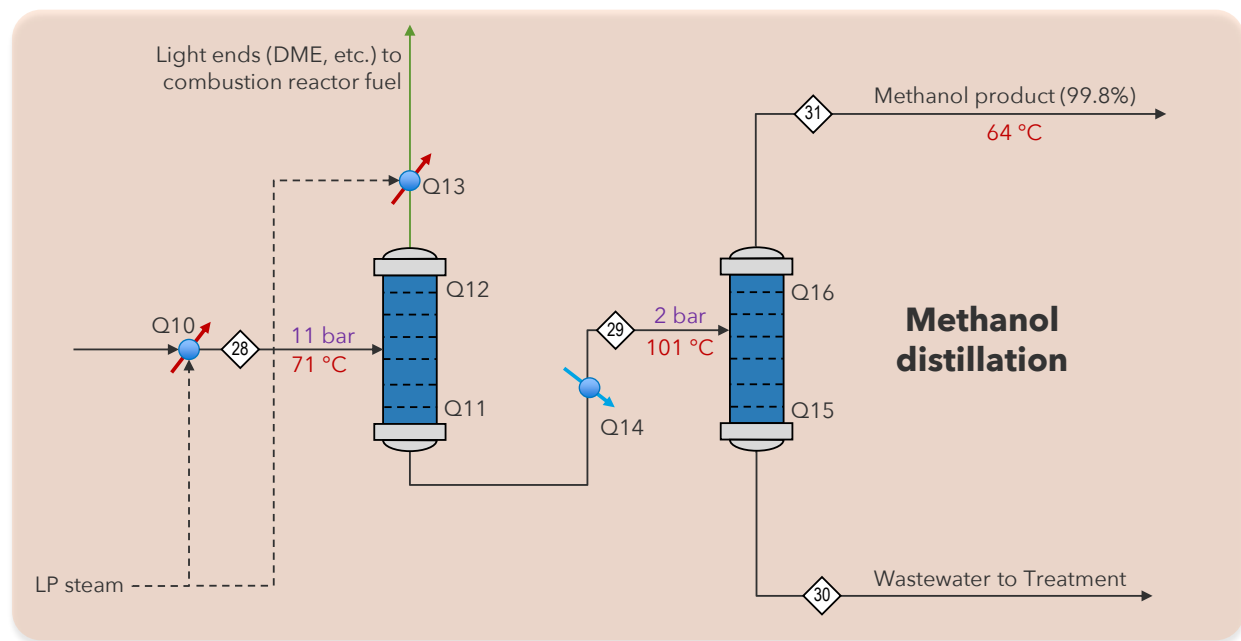

**Fig. S17.** Methanol distillation PFD for MPW-Methanol process

**Fig. S10** tracks the mass of carbon throughout the process and where the carbon ends up in the product. The main loss of carbon in the gasification section is the loss of carbon as char which is burnt to produce energy. The remaining carbon is converted to syngas and is processed in the methanol synthesis section. The purge results in a large loss of carbon from the recycle loop. About 63% of the initial carbon ends up in methanol. Carbon balance tells only part of the story as the carbon atom picks up the oxygen molecule in methanol formation resulting in enhancing the mass yield. The loss of carbon is compensated by the oxygen molecule and methanol mass yield is ~1.47 kg methanol/kg mixed plastic waste feedstock.

**Combustion v/s chemical synthesis pathways for MPW conversion.** Waste plastics are chemically just hydrocarbons and combusting them should provide energy. Power generation was not considered since chemical synthesis produces a higher value of products than electricity production.<sup>19</sup> A waste to energy plant combusting waste plastics will definitely see an increase in the electricity generation since calorific value of plastics is high. However, from an economic perspective, combusting waste plastic to generate electricity is not attractive. A simple calculation can ascertain that the economic value of chemical products from 1 kg of MPW is much more than that obtained from electricity generation by combustion. Based on plastics chemical composition in **Table 2**, combustion of 1 kg of MPW releases 43.4 MJ/kg (12.06 kWh/kg). Since WTE plants have efficiencies of 22-25%,<sup>20</sup> assuming 23.5% efficiency and electricity sale price of 4.37 ¢/kWh, revenue by selling electricity is 11.3 ¢/kg. For comparison, the conversion of waste plastics to methanol can be summarized as ( $-\text{CH}_2- + \text{H}_2\text{O} \rightarrow \text{CH}_3\text{OH}$ )

Based on stoichiometry, 1 kg of MPW can produce 2.29 kg methanol (from 32/14, i.e., the molecular weight of methanol/molecular weight of reactant unit,  $\text{CH}_2$ ). The methanol market price is \$0.30/kg; hence revenue is \$0.71/kg MPW. This assumes 100% yield, but actual mass yield as reported in **Table 3** is 1.47 kg methanol/kg MPW. Hence, actual revenue reduces to 44.1 ¢/kg MPW. Therefore, the economic value of products produced by 1 kg of MPW



could be about 4 times more in chemicals produced by synthesis pathways, like methanol than from energy generation by combustion.

**Table S23.** Stream summary for MPW-Methanol process. Detailed PFDs for MPW-Methanol process are shown in **Fig. S13 - S15, S17.**

| Stream no. →         |                                    | 1     | 2     | 3      | 4    | 5     | 6     | 7     | 8      | 9     | 10    | 11    | 12    | 13    | 14   | 15    |
|----------------------|------------------------------------|-------|-------|--------|------|-------|-------|-------|--------|-------|-------|-------|-------|-------|------|-------|
| Temperature, C       |                                    | 25.0  | 190.6 | 30.0   | 25.0 | 108.6 | 46.6  | 835.1 | 880.0  | 835.1 | 835.1 | 835.1 | 890.0 | 40    | 40.0 | 40.0  |
| Pressure, bar        |                                    | 1     | 3     | 1      | 1    | 1     | 1     | 1     | 1      | 1     | 1     | 1     | 1     | 1     | 1    | 1     |
| Mass vapor fraction  |                                    | 0     | 1     | 1      | 1    | 1     | 1     | 0     | 1      | 0.97  | 1     | 0     | 1     | 0     | 0    | 1     |
| Mass liquid fraction |                                    | 0     | 0     | 0      | 0    | 0     | 0     | 0     | 0      | 0     | 0     | 0     | 0     | 1     | 1    | 0     |
| Mass solid fraction  |                                    | 1     | 0     | 0      | 0    | 0     | 0     | 1     | 0      | 0.03  | 0     | 1     | 0     | 0     | 0    | 0     |
| MT/D                 | Total mass flow                    | 240.0 | 480.0 | 1858.1 | 25.2 | 34.6  | 120.1 | 22.5  | 2060.6 | 720.0 | 695.5 | 2.0   | 695.5 | 222.5 | 0.8  | 472.1 |
|                      | H <sub>2</sub> O                   | -     | 480.0 | -      | -    | 1.3   | 0.2   | -     | 239.4  | 346.7 | 346.7 | -     | 264.4 | 222.5 | -    | 41.8  |
|                      | H <sub>2</sub>                     | -     | -     | -      | -    | 0.0   | 16.7  | -     | -      | 21.2  | 21.2  | -     | 40.4  | -     | -    | 40.4  |
|                      | CO                                 | -     | -     | -      | -    | 0.2   | 39.9  | -     | -      | 137.9 | 137.9 | -     | 265.9 | -     | -    | 265.8 |
|                      | CO <sub>2</sub>                    | -     | -     | -      | -    | 11.0  | 58.4  | -     | 323.8  | 49.3  | 49.3  | -     | 49.3  | -     | -    | 49.2  |
|                      | CH <sub>4</sub>                    | -     | -     | -      | 25.2 | -     | 1.4   | -     | -      | 61.0  | 61.0  | -     | 48.8  | -     | -    | 48.8  |
|                      | C <sub>2</sub> H <sub>4</sub>      | -     | -     | -      | -    | -     | -     | -     | -      | 50.2  | 50.2  | -     | 25.1  | -     | -    | 25.1  |
|                      | C <sub>2</sub> H <sub>6</sub>      | -     | -     | -      | -    | -     | -     | -     | -      | 3.8   | 3.8   | -     | 0.4   | -     | -    | 0.4   |
|                      | C <sub>3</sub> H <sub>8</sub>      | -     | -     | -      | -    | -     | -     | -     | -      | 9.9   | 9.9   | -     | 0.5   | -     | -    | 0.5   |
|                      | C <sub>10</sub> H <sub>8</sub>     | -     | -     | -      | -    | -     | -     | -     | -      | 15.5  | 15.5  | -     | 0.8   | -     | 0.8  | -     |
|                      | N <sub>2</sub>                     | -     | -     | 1425.3 | -    | -     | -     | -     | 1425.3 | -     | -     | -     | -     | -     | -    | -     |
|                      | O <sub>2</sub>                     | -     | -     | 432.8  | -    | -     | -     | -     | 72.1   | -     | -     | -     | -     | -     | -    | -     |
|                      | C                                  | -     | -     | -      | -    | -     | -     | 22.5  | -      | 22.5  | -     | -     | -     | -     | -    | -     |
|                      | Ash                                | -     | -     | -      | -    | -     | -     | -     | -      | 0.2   | -     | 0.2   | -     | -     | -    | -     |
|                      | Char2                              | -     | -     | -      | -    | -     | -     | -     | -      | 1.7   | -     | 1.7   | -     | -     | -    | -     |
|                      | MPW                                | 240.0 | -     | -      | -    | -     | -     | -     | -      | -     | -     | -     | -     | -     | -    | -     |
|                      | CH <sub>3</sub> OH                 | -     | -     | -      | -    | 21.4  | 2.9   | -     | -      | -     | -     | -     | -     | -     | -    | -     |
|                      | CH <sub>3</sub> -O-CH <sub>3</sub> | -     | -     | -      | -    | 0.5   | 0.6   | -     | -      | -     | -     | -     | -     | -     | -    | -     |

**Table S24.** Stream summary for MPW-Methanol process (contd.). Detailed PFDs for MPW-Methanol process are shown in **Fig. S13 - S15, S17**.

| Stream no. →         |                                    | 16    | 17    | 18     | 19    | 20    | 21     | 22     | 23    | 24    | 25    | 26    | 27    | 28    | 29    | 30    | 31    |
|----------------------|------------------------------------|-------|-------|--------|-------|-------|--------|--------|-------|-------|-------|-------|-------|-------|-------|-------|-------|
| Temperature, °C      |                                    | 190.6 | 187.5 | 800.0  | 40.0  | 40.0  | 226.4  | 220.0  | 50.0  | 50.0  | 232.0 | 50.0  | 200.0 | 71.0  | 101.0 | 88.8  | 63.8  |
| Pressure, bar        |                                    | 3     | 3     | 3      | 3     | 3     | 80     | 80     | 60    | 60    | 80    | 60    | 3     | 11    | 2     | 1     | 1     |
| Mass vapor fraction  |                                    | 1     | 1     | 1      | 0     | 1     | 1      | 1      | 1     | 1     | 1     | 0     | 1     | 0     | 1     | 0     | 0     |
| Mass liquid fraction |                                    | 0     | 0     | 0      | 1     | 0     | 0      | 0      | 0     | 0     | 0     | 1     | 0     | 1     | 0     | 1     | 1     |
| Mass solid fraction  |                                    | 0     | 0     | 0      | 0     | 0     | 0      | 0      | 0     | 0     | 0     | 0     | 0     | 0     | 0     | 0     | 0     |
| MT/D                 | Total mass flow                    | 795.3 | 472.1 | 1267.4 | 611.8 | 655.6 | 1336.4 | 1336.4 | 800.9 | 120.1 | 680.8 | 535.4 | 960.0 | 535.4 | 500.8 | 147.1 | 353.8 |
|                      | H <sub>2</sub> O                   | 795.3 | 41.8  | 633.1  | 611.8 | 21.2  | 22.6   | 132.3  | 1.6   | 0.2   | 1.4   | 130.7 | 960.0 | 130.7 | 129.3 | 128.7 | 0.7   |
|                      | H <sub>2</sub>                     | -     | 40.4  | 78.9   | -     | 78.9  | 173.4  | 111.2  | 111.1 | 16.7  | 94.4  | -     | -     | -     | -     | -     | -     |
|                      | CO                                 | -     | 265.8 | 217.8  | -     | 217.8 | 444.1  | 266.5  | 266.3 | 39.9  | 226.3 | 0.2   | -     | 0.2   | -     | -     | -     |
|                      | CO <sub>2</sub>                    | -     | 49.2  | 336.2  | -     | 336.2 | 667.0  | 400.2  | 389.2 | 58.4  | 330.8 | 11.0  | -     | 11.0  | -     | -     | -     |
|                      | CH <sub>4</sub>                    | -     | 48.8  | 1.4    | -     | 1.4   | 9.1    | 9.1    | 9.1   | 1.4   | 7.7   | -     | -     | -     | -     | -     | -     |
|                      | C <sub>2</sub> H <sub>4</sub>      | -     | 25.1  | -      | -     | -     | -      | -      | -     | -     | -     | -     | -     | -     | -     | -     | -     |
|                      | C <sub>2</sub> H <sub>6</sub>      | -     | 0.4   | -      | -     | -     | -      | -      | -     | -     | -     | -     | -     | -     | -     | -     | -     |
|                      | C <sub>3</sub> H <sub>8</sub>      | -     | 0.5   | -      | -     | -     | -      | -      | -     | -     | -     | -     | -     | -     | -     | -     | -     |
|                      | C <sub>10</sub> H <sub>8</sub>     | -     | -     | -      | -     | -     | -      | -      | -     | -     | -     | -     | -     | -     | -     | -     | -     |
|                      | N <sub>2</sub>                     | -     | -     | -      | -     | -     | -      | -      | -     | -     | -     | -     | -     | -     | -     | -     | -     |
|                      | O <sub>2</sub>                     | -     | -     | -      | -     | -     | -      | -      | -     | -     | -     | -     | -     | -     | -     | -     | -     |
|                      | C                                  | -     | -     | -      | -     | -     | -      | -      | -     | -     | -     | -     | -     | -     | -     | -     | -     |
|                      | Ash                                | -     | -     | -      | -     | -     | -      | -      | -     | -     | -     | -     | -     | -     | -     | -     | -     |
|                      | Char2                              | -     | -     | -      | -     | -     | -      | -      | -     | -     | -     | -     | -     | -     | -     | -     | -     |
|                      | MPW                                | -     | -     | -      | -     | -     | -      | -      | -     | -     | -     | -     | -     | -     | -     | -     | -     |
|                      | CH <sub>3</sub> OH                 | -     | -     | -      | -     | -     | 16.5   | 412.3  | 19.4  | 2.9   | 16.5  | 392.9 | -     | 392.9 | 371.5 | 18.4  | 353.1 |
|                      | CH <sub>3</sub> -O-CH <sub>3</sub> | -     | -     | -      | -     | -     | 3.7    | 4.8    | 4.3   | 0.6   | 3.7   | 0.5   | -     | 0.5   | -     | -     | -     |



process economics as the final product does not contain any carbon. Therefore, the S/C ratio for the MSW-Methanol process was fixed at 1.3.

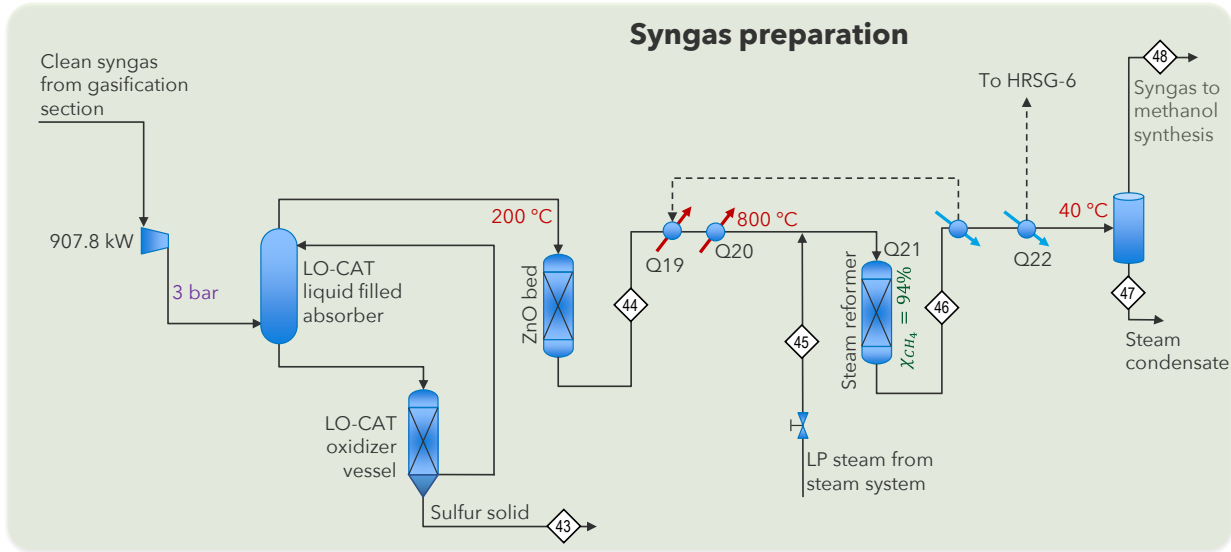

**Fig. S19.** Syngas preparation PFD for MSW-Methanol process

The sulfur content in MSW is 0.3% by wt. corresponding to 3000 ppmw. Hence, bulk sulfur removal is necessary which is accomplished by a liquid oxidation catalyst in the LO-CAT system. It is a liquid redox system that uses a chelated iron solution to reduce  $H_2S$  to elemental sulfur<sup>23</sup>. The sulfur content reduces to about 50 ppm and the remainder is removed by a ZnO bed. The syngas preparation PFD for MSW-Methanol process is shown in **Fig. S19**.

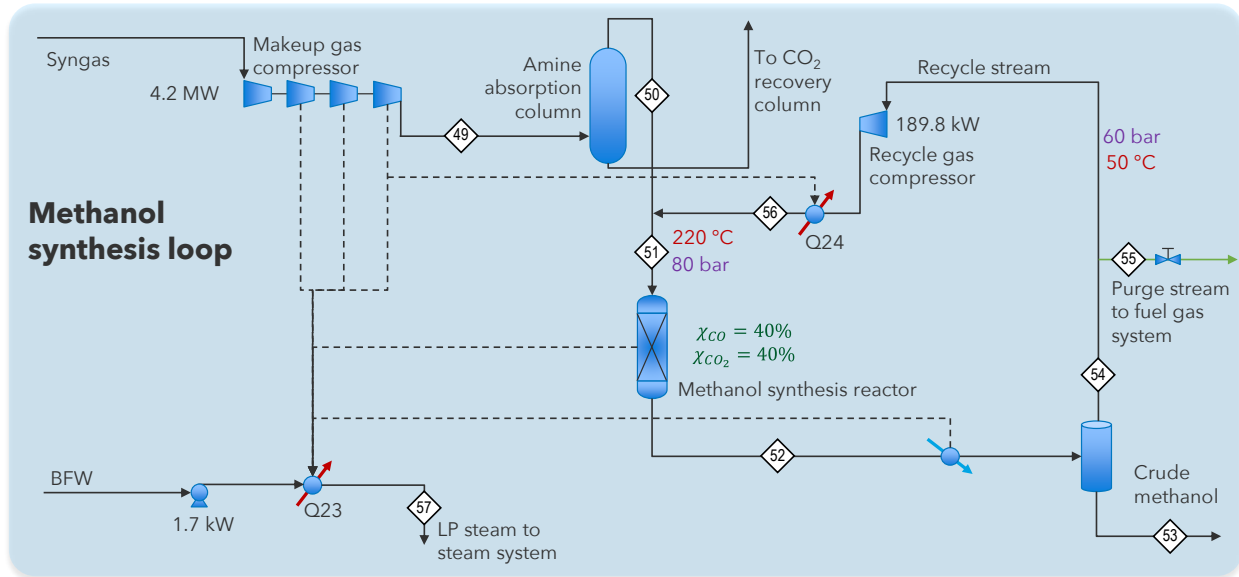

**Fig. S20.** Methanol synthesis PFD for MSW-Methanol process

The  $CO_2$  content in the syngas after MSW gasification and reforming steps is high at 21%. Though  $CO_2$  is a reactant in the methanol synthesis reaction, it is usually limited to about 7.5% at the reactor inlet to maximize methanol production rates based on kinetic studies<sup>24</sup>. To accomplish this, a  $CO_2$  recovery unit was added to remove as much  $CO_2$  as necessary to ensure a mole fraction of 0.075 for  $CO_2$  at the methanol synthesis reactor inlet. The PFD for methanol synthesis and distillation are shown in **Fig. S20** and **Fig. S21** respectively. The MSW gasifier does not have a combustion reactor, and hence the purge gas and light ends from the first distillation column is routed as fuel to reformer furnaces as shown in **Fig. S22**.

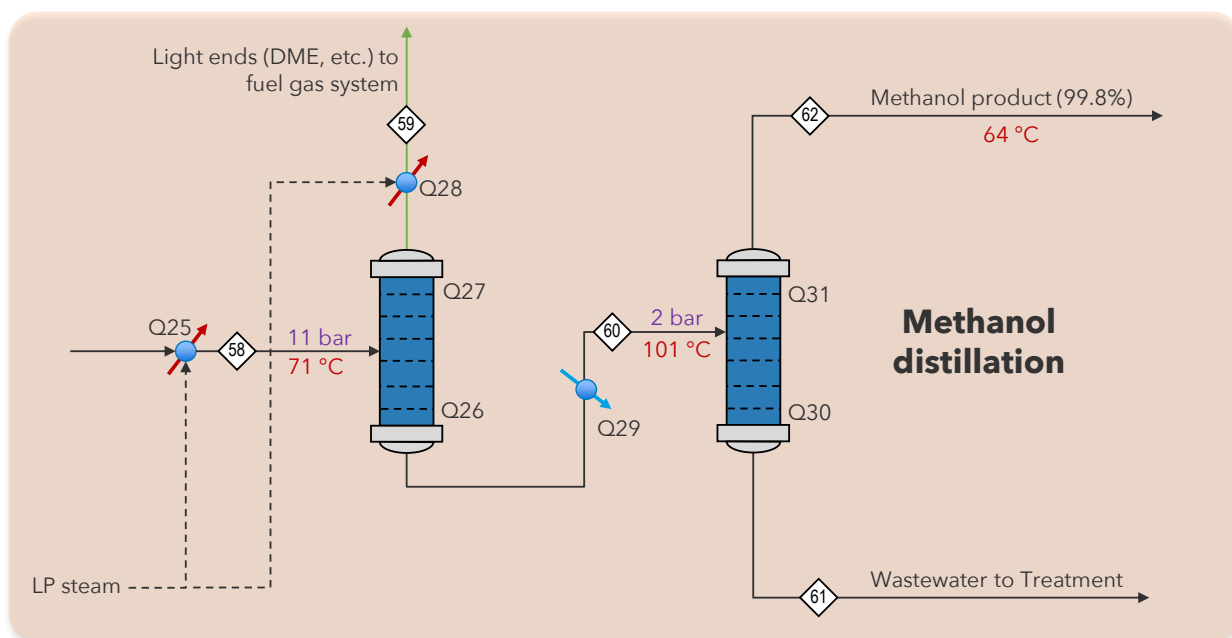

Fig. S21. Methanol distillation PFD for MSW-Methanol process

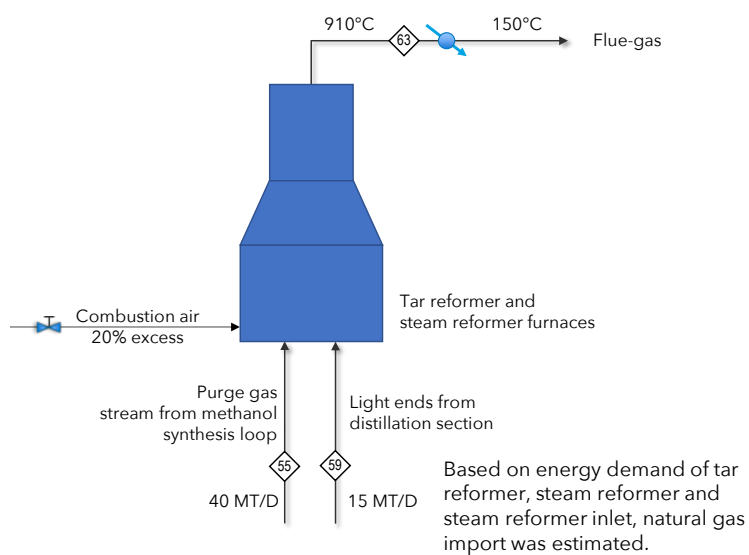

Fig. S22. Fuel-gas system for MSW-Methanol process

**Table S25.** Stream summary of MSW-Methanol process. Detailed PFDs for MSW-Methanol process are shown in **Fig. S18 – S22**.

| Stream no. →         |                                | 32     | 33     | 34    | 35    | 36     | 37     | 38     | 39    | 40   | 41   | 42     | 43   | 44     | 45     | 46     | 47     | 48     |   |
|----------------------|--------------------------------|--------|--------|-------|-------|--------|--------|--------|-------|------|------|--------|------|--------|--------|--------|--------|--------|---|
| Temperature, °C      |                                | 25.0   | 152.5  | 25.0  | 785.7 | 785.7  | 785.7  | 890.0  | 40.0  | 40.0 | 40.0 | 40.0   | 45.0 | 183.2  | 152.5  | 800.0  | 40.0   | 40.0   |   |
| Pressure, bar        |                                | 1      | 3      | 1     | 1     | 1      | 1      | 1      | 1     | 1    | 1    | 1      | 1    | 3      | 3      | 3      | 3      | 3      |   |
| Mass vapor fraction  |                                | 0      | 1      | 1     | 0     | 0.86   | 1      | 1      | 0     | 1    | 0    | 1      | 0.68 | 1      | 1      | 1      | 0      | 1      |   |
| Mass liquid fraction |                                | 0      | 0      | 0     | 0     | 0.00   | 0      | 0      | 1     | 0    | 1    | 0      | 0.32 | 0      | 0      | 0      | 1      | 0      |   |
| Mass solid fraction  |                                | 1      | 0      | 0     | 1     | 0.14   | 0      | 0      | 0     | 0    | 0    | 0      | 0    | 0      | 0      | 0      | 0      | 0      |   |
| MT/D                 | Total mass flow                | 240.00 | 105.97 | 50.03 | 56.80 | 396.00 | 339.20 | 339.20 | 32.49 | 0.03 | 0.33 | 306.36 | 0.15 | 306.23 | 174.05 | 480.28 | 155.52 | 324.76 |   |
|                      | H <sub>2</sub> O               | -      | 105.97 | -     | -     | 106.03 | 106.03 | 51.79  | 32.48 | -    | -    | 19.31  | 0.01 | 19.31  | 174.05 | 162.97 | 155.51 | 7.46   |   |
|                      | H <sub>2</sub>                 | -      | -      | -     | -     | 1.74   | 1.74   | 15.62  | -     | -    | -    | 15.62  | -    | 15.62  | -      | 21.79  | -      | 21.79  |   |
|                      | CO                             | -      | -      | -     | -     | 41.53  | 41.53  | 125.86 | -     | 0.01 | -    | 125.85 | -    | 125.85 | -      | 120.17 | -      | 120.17 |   |
|                      | CO <sub>2</sub>                | -      | -      | -     | -     | 131.49 | 131.49 | 131.49 | -     | 0.01 | -    | 131.48 | 0.03 | 131.48 | -      | 173.05 | -      | 173.05 |   |
|                      | CH <sub>4</sub>                | -      | -      | -     | -     | 11.60  | 11.60  | 9.28   | -     | -    | -    | 9.28   | -    | 9.28   | -      | 0.64   | -      | 0.64   |   |
|                      | C <sub>2</sub> H <sub>4</sub>  | -      | -      | -     | -     | -      | -      | -      | -     | -    | -    | -      | -    | -      | -      | -      | -      | -      |   |
|                      | C <sub>2</sub> H <sub>6</sub>  | -      | -      | -     | -     | 22.40  | 22.40  | 2.24   | -     | -    | -    | 2.24   | -    | 2.24   | -      | -      | -      | -      |   |
|                      | C <sub>3</sub> H <sub>6</sub>  | -      | -      | -     | -     | -      | -      | -      | -     | -    | -    | -      | -    | -      | -      | -      | -      | -      |   |
|                      | C <sub>3</sub> H <sub>8</sub>  | -      | -      | -     | -     | 16.01  | 16.01  | 0.80   | -     | -    | -    | 0.80   | -    | 0.80   | -      | -      | -      | -      |   |
|                      | C <sub>10</sub> H <sub>8</sub> | -      | -      | -     | -     | 6.62   | 6.62   | 0.33   | -     | -    | 0.33 | -      | -    | -      | -      | -      | -      | -      |   |
|                      | N <sub>2</sub>                 | -      | -      | -     | -     | 1.65   | 1.65   | 1.65   | -     | -    | -    | 1.65   | 0.07 | 1.65   | -      | 1.65   | -      | 1.65   |   |
|                      | O <sub>2</sub>                 | -      | -      | 50.03 | -     | -      | -      | -      | -     | -    | -    | -      | -    | -      | -      | -      | -      | -      | - |
|                      | S                              | -      | -      | -     | -     | -      | -      | -      | -     | -    | -    | -      | 0.04 | -      | -      | -      | -      | -      |   |
|                      | Ash                            | -      | -      | -     | 43.92 | 43.92  | -      | -      | -     | -    | -    | -      | -    | -      | -      | -      | -      | -      |   |
|                      | Char2                          | -      | -      | -     | 12.88 | 12.88  | -      | -      | -     | -    | -    | -      | -    | -      | -      | -      | -      | -      |   |
|                      | MSW                            | 240.00 | -      | -     | -     | -      | -      | -      | -     | -    | -    | -      | -    | -      | -      | -      | -      | -      | - |
|                      | COS                            | -      | -      | -     | -     | 0.04   | 0.04   | 0.04   | -     | -    | -    | 0.04   | -    | -      | -      | -      | -      | -      | - |
|                      | NH3                            | -      | -      | -     | -     | 0.07   | 0.07   | 0.07   | -     | -    | -    | 0.07   | -    | -      | -      | -      | 0.01   | -      | - |
|                      | H2S                            | -      | -      | -     | -     | 0.02   | 0.02   | 0.02   | -     | -    | -    | 0.02   | -    | -      | -      | -      | -      | -      | - |

**Table S26.** Stream summary of MSW-Methanol process (contd.). Detailed PFDs for MSW-Methanol process are shown in **Fig. S18 – S22**.

| Stream no. →         | 49                                 | 50     | 51     | 52     | 53     | 54     | 55     | 56    | 57     | 58     | 59     | 60    | 61     | 62    | 63     |
|----------------------|------------------------------------|--------|--------|--------|--------|--------|--------|-------|--------|--------|--------|-------|--------|-------|--------|
| Temperature, °C      | 220.0                              | 220.0  | 219.7  | 220.0  | 50.0   | 50.0   | 50.0   | 219.6 | 152.7  | 71.0   | 103.3  | 101.0 | 85.5   | 63.8  | 910.0  |
| Pressure, bar        | 80                                 | 80     | 80     | 80     | 60     | 60     | 60     | 80    | 3      | 11     | 9      | 2     | 1      | 1     | 1      |
| Mass vapor fraction  | 1                                  | 1      | 1      | 1      | 0      | 1      | 1      | 1     | 1      | 0      | 1      | 1     | 0      | 0     | 1      |
| Mass liquid fraction | 0                                  | 0      | 0      | 0      | 1      | 0      | 0      | 0     | 0      | 1      | 0      | 0     | 1      | 1     | 0      |
| Mass solid fraction  | 0                                  | 0      | 0      | 0      | 0      | 0      | 0      | 0     | 0      | 0      | 0      | 0     | 0      | 0     | 0      |
| MT/D                 | Total Mass flow                    | 324.76 | 203.79 | 426.55 | 426.55 | 164.48 | 262.08 | 39.31 | 222.76 | 337.99 | 164.48 | 16.11 | 148.36 | 33.90 | 382.54 |
|                      | H <sub>2</sub> O                   | 7.46   | 7.46   | 7.72   | 28.25  | 27.95  | 0.30   | 0.05  | 0.26   | 337.99 | 27.95  | 0.18  | 27.77  | 27.55 | 40.26  |
|                      | H <sub>2</sub>                     | 21.79  | 21.79  | 34.04  | 14.42  | 0.01   | 14.41  | 2.16  | 12.25  | -      | 0.01   | 0.01  | -      | -     | -      |
|                      | CO                                 | 120.17 | 120.17 | 244.81 | 146.88 | 0.25   | 146.63 | 21.99 | 124.64 | -      | 0.25   | 0.25  | -      | -     | -      |
|                      | CO <sub>2</sub>                    | 173.05 | 52.08  | 100.45 | 60.27  | 3.36   | 56.91  | 8.54  | 48.38  | -      | 3.36   | 3.36  | -      | -     | 77.01  |
|                      | CH <sub>4</sub>                    | 0.64   | 0.64   | 4.08   | 4.08   | 0.03   | 4.04   | 0.61  | 3.44   | -      | 0.03   | 0.03  | -      | -     | -      |
|                      | C <sub>2</sub> H <sub>4</sub>      | -      | -      | -      | -      | -      | -      | -     | -      | -      | -      | -     | -      | -     | -      |
|                      | C <sub>2</sub> H <sub>6</sub>      | -      | -      | -      | -      | -      | -      | -     | -      | -      | -      | -     | -      | -     | -      |
|                      | C <sub>3</sub> H <sub>6</sub>      | -      | -      | -      | -      | -      | -      | -     | -      | -      | -      | -     | -      | -     | -      |
|                      | C <sub>3</sub> H <sub>8</sub>      | -      | -      | -      | -      | -      | -      | -     | -      | -      | -      | -     | -      | -     | -      |
|                      | N <sub>2</sub>                     | 1.65   | 1.65   | 10.76  | 10.76  | 0.04   | 10.73  | 1.61  | 9.12   | -      | 0.04   | 0.04  | -      | -     | 252.57 |
|                      | O <sub>2</sub>                     | -      | -      | -      | -      | -      | -      | -     | -      | -      | -      | -     | -      | -     | 12.69  |
|                      | CH <sub>3</sub> OH                 | -      | -      | 3.98   | 130.73 | 126.04 | 4.69   | 0.70  | 3.98   | -      | 126.04 | 5.45  | 120.59 | 6.35  | 114.24 |
|                      | CH <sub>3</sub> -O-CH <sub>3</sub> | -      | -      | 20.70  | 31.14  | 6.79   | 24.36  | 3.65  | 20.70  | -      | 6.79   | 6.79  | -      | -     | -      |
|                      | NH <sub>3</sub>                    | -      | -      | 0.01   | 0.01   | -      | -      | -     | -      | -      | -      | -     | -      | -     | -      |



**Capital cost and annual operating cost estimation.** For the MSW-Methanol process with MSW feed capacity of 240 MT/D, the total capital investment (TCI) is \$79M and the annual operating cost is \$11M. Based on a previous report,<sup>19</sup> the total capital cost estimation for the same process and same MSW processing capacity was \$70M (scaled based on the six-tenth rule). The cost breakdown of CAPEX and OPEX is shown in Fig. . For capital costs, the breakdown is similar to the MPW-Methanol process; the combined contribution of gasification and syngas preparation sections to the overall CAPEX is slightly higher in MSW-Methanol process when compared to MPW-Methanol process (34% vs 29%). The increase can be attributed to the additional sulfur removal equipment (LO-CAT) used in the MSW process. In operational costs, the primary material input is oxygen. The OPEX is much lower in the MSW-Methanol process compared to the MPW-Methanol process since the MSW feedstock cost is assumed to be zero in the base case.

**Sensitivity analysis on key cost drivers for hydrogen production.** A similar sensitivity analysis was carried out for the MSW-Methanol process and the results are shown in Fig. S4. It is interesting to note that syngas yield, which was a very critical parameter in MPW-Methanol is not so for the MSW-Methanol process. Reducing the syngas yield by 50% in the MPW process resulted in an 86% increase in methanol MSP. However, reducing the syngas yield by 50% in the MSW-methanol case results in a 28% increase in methanol MSP (extrapolated linearly). The larger impact of syngas yield on the methanol MSP is due to the feedstock cost and waste disposal costs. The mixed plastic waste is available for a high cost (\$0.60/kg). Any reduction in syngas yield has two negative effects on process economics – (1) reduction in product yield and (2) increase in solid residue from the gasifier. Solid waste disposal is assumed at the US average rate of \$59/MT.<sup>7</sup> The same effect is not seen for MSW as the feedstock is considered zero cost for the base case. Hence, though a reduction in syngas yield increases MSP, other parameters like plant capacity, IRR, and tipping fee have a larger impact. Hence, for the same downstream product, a change in feedstock changes the relative impact of different variables on the product MSP.

Of all the variables studied, the plant capacity has the largest impact on the methanol MSP from the MSW-Methanol process. The MSW-Methanol process is sensitive to economies of scale and a larger plant will exhibit better process economics. The process-relevant variables of methanol loop purge fraction and single-pass conversion in the methanol reactor impact the methanol MSP from -9% to +12% for the ranges studied. Variations in the methanol side-products % (methanol to DME conversion) have a smaller impact on the MSP with their effect being only  $\pm 4\%$  from the base case. Since oxygen is fed to the gasifier, the effect of including the air separation unit (ASU) CAPEX was assessed. The MSP increases by 8% if the ASU CAPEX is included in the capital costs of the MSW-Methanol process. The capital costs were taken from literature<sup>25</sup> and scaled for the current O<sub>2</sub> feed requirement.

The tipping fee is the disposal fee charged by the owner or operator of a landfill site, and it varies widely throughout different regions in the US. Hence, when using MSW as a feedstock, the plant operator obtains the feedstock as well as the tipping fee from municipalities disposing the MSW. The US national average tipping fee is \$59/MT.<sup>7</sup> A \$20/MT cost was added to account for the conversion of MSW to refuse-derived fuel (RDF), which is the MSW in pelletized form input to the gasifier.<sup>8</sup> Considering the additional income from the tipping fee for the MSW-Methanol process, the MSP of methanol reduces to \$0.49/kg. The average tipping fee in the Pacific region is \$79/MT,<sup>7</sup> and the corresponding methanol MSP reduces further to \$0.44/kg. Hence, securing long-term tipping fee agreements with city municipalities is one of the key requirements for the economic viability of MSW feedstock-based plants.

Varying the IRR from 5% to 15% impacts the methanol MSP by as much as  $\pm 16\%$  indicating a major effect. Similarly, varying TCI also affects the methanol MSP by -9% to +18% in the range studied. The impact of the financial variables is more prominent in the MSW-Methanol process compared to the MPW-Methanol process. In the MPW-Methanol process, the waste plastic feedstock results in a large annual operating cost of \$62M compared to its capital cost of \$75M. On the other hand, the MSW-Methanol has lower annual operating costs of \$11M when compared to its capital cost of \$40M. Hence, changes in capital costs affect the process economics more than the MPW-Methanol process.

### S5. MPW-Hydrogen process

The gasification and syngas preparation sections for the MPW-Hydrogen process remain identical as in the MPW-Methanol process, which was described in detail earlier. The modification is downstream of syngas preparation which is described here.

**Water-gas-shift (WGS).** The syngas after syngas preparation has a CO concentration of about 14%. Since hydrogen is the final desired product, a water-gas-shift reactor is used to convert the CO to  $H_2$  by the WGS reaction. The CO conversion was fixed at 90%<sup>26</sup> using an RSTOIC block in ASPEN Plus. The PFD for WGS of the MPW-Hydrogen process is shown in **Fig. S23**.

**Pressure swing adsorption (PSA).** The PSA adsorbents are selected based on the composition of the impurities and are usually a combination of silica gel, alumina, activated carbon, and zeolite<sup>27</sup>. Most of the hydrogen passes without being adsorbed though there are some losses by adsorption. A cyclic process is used with each bed in either adsorption, depressurization, or purge mode. An elaborate control system is used to automate the control valves in a PSA unit. The PSA PFD for MPW-Hydrogen process is shown in **Fig. S24**.

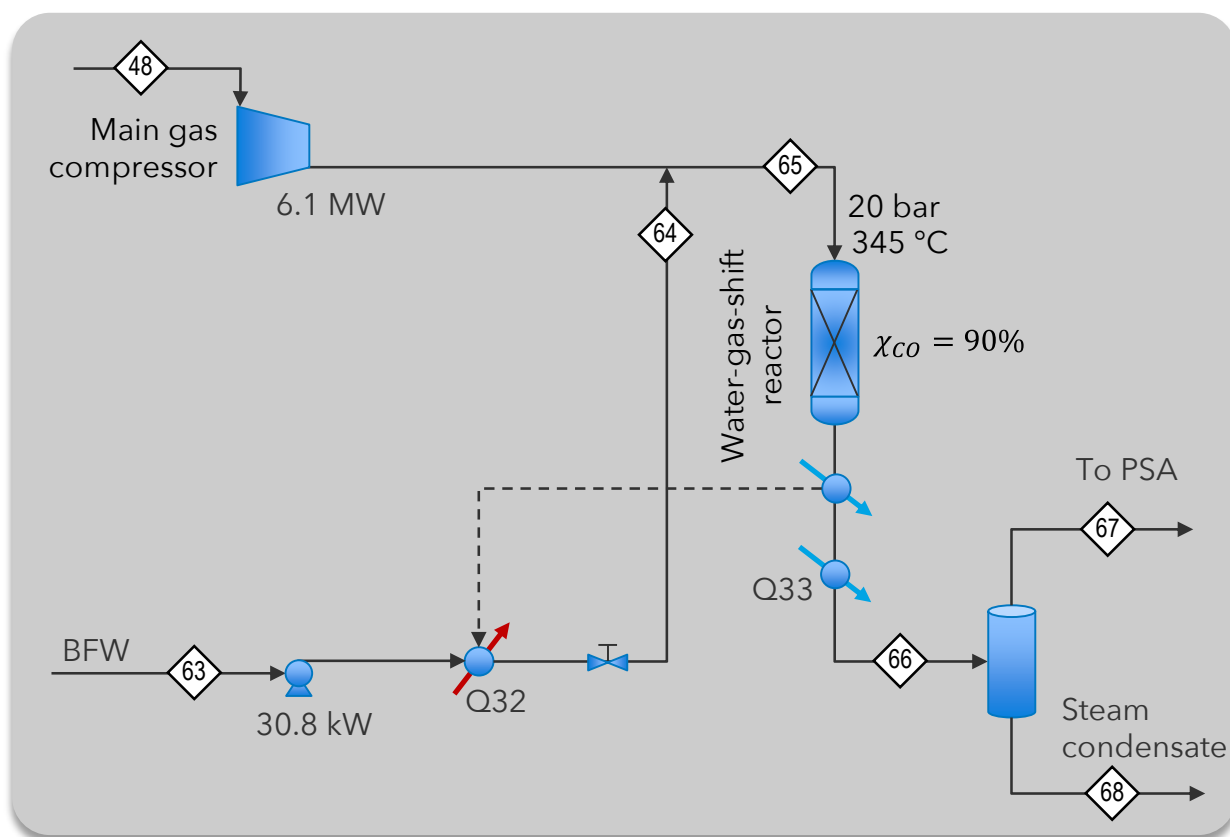

**Fig. S23.** WGS PFD for MPW-Hydrogen process.

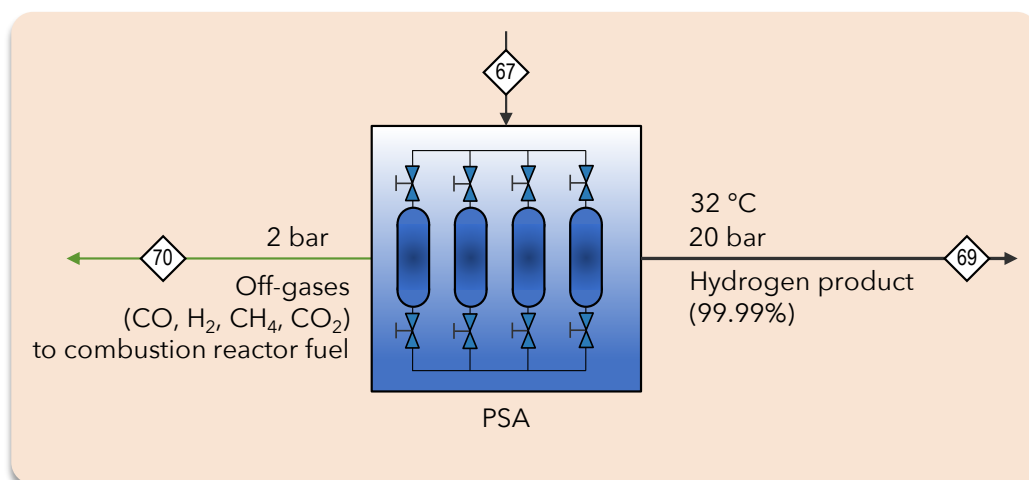

**Fig. S24.** PSA PFD for MPW-Hydrogen process.

**Table S27.** Stream summary of MPW-Hydrogen process. Detailed PFDs for MSW-Methanol process are shown in **Fig. S23 - S24.**

| Stream No. →         | 63               | 64     | 65     | 66      | 67      | 68     | 69     | 70     |
|----------------------|------------------|--------|--------|---------|---------|--------|--------|--------|
| Temperature, °C      | 25.0             | 357.7  | 344.8  | 32.0    | 32.0    | 32.0   | 32     | 23.7   |
| Pressure, bar        | 1                | 20     | 20     | 20      | 20      | 20     | 20     | 2      |
| Mass Vapor Fraction  | 0                | 1      | 1      | 0.52    | 1       | 0      | 1      | 1      |
| Mass Liquid Fraction | 1                | 0      | 0      | 0.48    | 0       | 1      | 0      | 0      |
| Mass Solid Fraction  | 0                | 0      | 0      | 0       | 0       | 0      | 0      | 0      |
| MT/D                 | Total Mass flow  | 816.55 | 816.55 | 1472.13 | 1472.13 | 762.71 | 709.41 | 692.93 |
|                      | H <sub>2</sub> O | 816.55 | 816.55 | 837.80  | 711.74  | 2.43   | 709.31 | 2.43   |
|                      | H <sub>2</sub>   | -      | -      | 78.94   | 93.04   | 93.04  | -      | 69.78  |
|                      | CO               | -      | -      | 217.77  | 21.78   | 21.78  | -      | 21.78  |
|                      | CO <sub>2</sub>  | -      | -      | 336.23  | 644.16  | 644.06 | 0.11   | 644.06 |
|                      | CH <sub>4</sub>  | -      | -      | 1.40    | 1.40    | 1.40   | -      | 1.40   |

**Theoretical maximum hydrogen production from MPW.** To better understand the maximum potential of mixed plastic waste to produce hydrogen, a simple stoichiometric targeting analysis is done. Based on the MPW stream elemental composition shown in **Table 2** in the manuscript, the hydrogen content in MPW is 14% by weight. Therefore, the maximum H<sub>2</sub> production solely from MPW without the addition of any external hydrogen is 14 g/100 g waste plastic solid feedstock. The H<sub>2</sub> production can be enhanced by using steam gasification. Assuming CH<sub>2</sub> is the plastic feedstock reactant unit, the steam reforming reaction is:

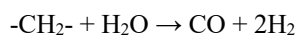

Hence, the maximum H<sub>2</sub> yield is 4 g H<sub>2</sub>/ 14 g plastic = 28.6 g H<sub>2</sub>/100 g MPW.

To further boost the H<sub>2</sub> yield, a water-gas-shift (WGS) reactor can be used. The overall reaction then becomes:

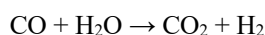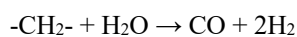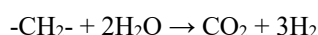

The maximum H<sub>2</sub> yield for this overall reaction is 6.0 g H<sub>2</sub>/ 14 g plastic = 42.9 g H<sub>2</sub>/100 g MPW. Hence, the maximum stoichiometric target for hydrogen production from waste plastic feedstock is 42.9 g H<sub>2</sub>/100 g MPW.

## S6. MSW-Hydrogen process

The gasification and syngas preparation are the same as in the MSW-Methanol process that was described earlier. The water-gas-shift and the PSA sections were described in section S5 and the PFDs of these sections for the MSW-Hydrogen process are shown in Fig. S25-S26 respectively. The capital cost for the MSW-Hydrogen process for 240 MT/D MSW processing capacity is \$47M with TCI being \$93M. The breakdown of capital costs and annual operating costs is shown in Fig. S5. The pressure for WGS is 20 bar, not as high as the 80 bar that was needed for methanol synthesis. Hence, the WGS contribution to the CAPEX is a modest 32%. The operating costs are dominated by CO<sub>2</sub> recovery costs, indirect costs that include maintenance labor costs.

**Sensitivity analysis on key cost drivers for hydrogen production.** The tornado plot for the sensitivity analysis of variables in the MSW-Hydrogen process is shown in Fig. S8. The variable with the most impact on hydrogen MSP is the plant capacity. Hence, a larger plant capacity can reduce the hydrogen MSP produced by MSW gasification. Doubling the plant capacity to 500 MT/D MSW feed capacity lowers the hydrogen MSP to \$2.62/kg. PSA H<sub>2</sub> recovery is the next critical variable since any hydrogen lost in the PSA is combusted as fuel, thereby reducing H<sub>2</sub> yield. The syngas yield has a modest impact, reducing syngas yield by 30% results in a 17% increase of hydrogen MSP. The base case considers a zero-feedstock price for MSW. Considering an additional income for the MSW-Hydrogen plant from the tipping fee, the hydrogen MSP drops to \$2.82/kg, a reduction of 13% from the base case. Since this is a univariate analysis study, a combination of multiple variables changed in the right direction will reduce the hydrogen MSP even further. E.g., for a plant size of 500 MT/D MSW feed capacity, with 90% H<sub>2</sub> recovery in the PSA, the hydrogen MSP drops to \$1.89/kg, a reduction of 42% from the base case.

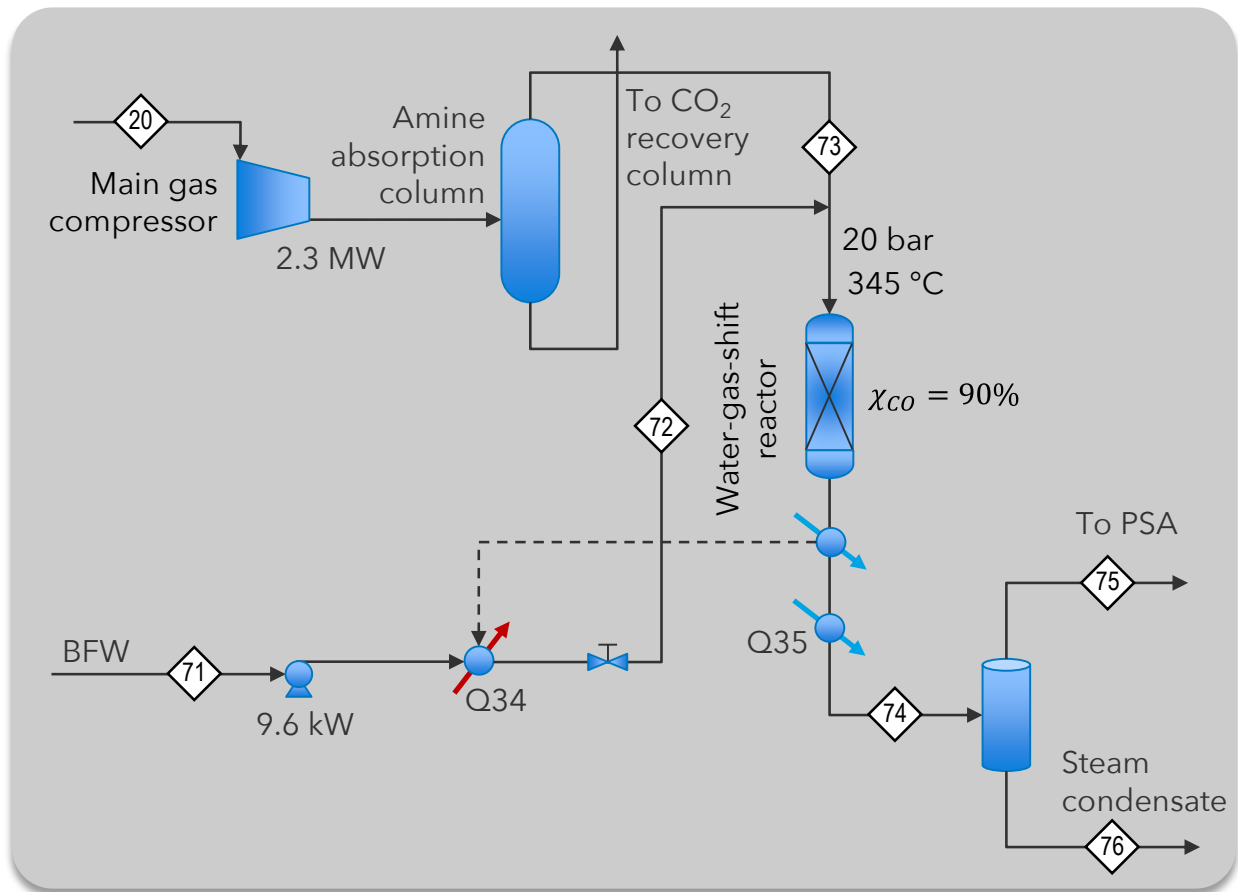

Fig. S25. WGS PFD for MSW-Hydrogen process.

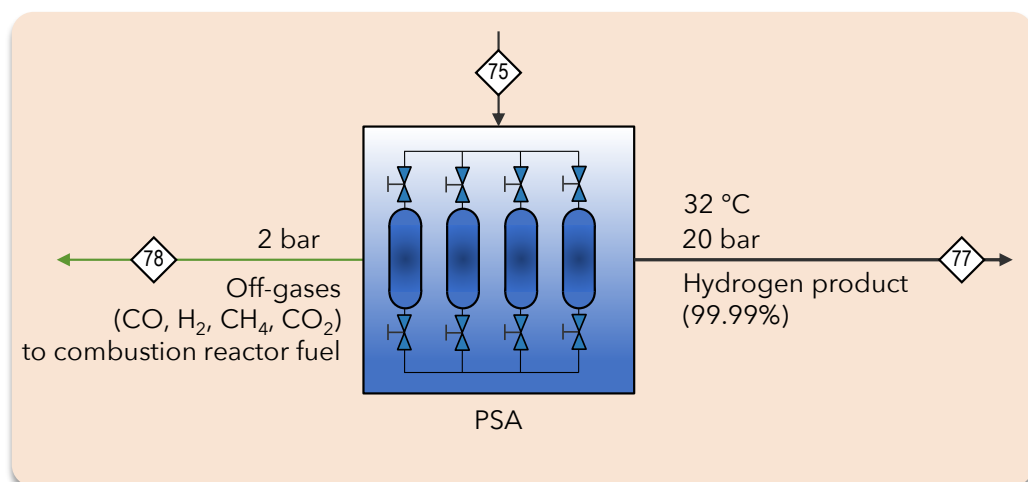

**Fig. S26.** PSA PFD for MSW-Hydrogen process.

**Table S28.** Stream summary of MSW-Hydrogen process. Detailed PFDs for MSW-Methanol process are shown in **Fig. S25-S26**.

| Stream No. →         |                  | 71     | 72     | 73     | 74     | 75     | 76     | 77    | 78     |
|----------------------|------------------|--------|--------|--------|--------|--------|--------|-------|--------|
| Temperature, °C      |                  | 25.0   | 389.3  | 321.3  | 32.0   | 32.0   | 32.0   | 32.0  | 22.0   |
| Pressure, bar        |                  | 1      | 20     | 20     | 20     | 20     | 20     | 20    | 2      |
| Mass Vapor Fraction  |                  | 0      | 1      | 1      | 0.58   | 1      | 0      | 1     | 1      |
| Mass Liquid Fraction |                  | 1      | 0      | 0      | 0.42   | 0      | 1      | 0     | 0      |
| Mass Solid Fraction  |                  | 0      | 0      | 0      | 0      | 0      | 0      | 0     | 0      |
| MT/D                 | Total Mass flow  | 151.72 | 151.72 | 119.16 | 270.88 | 157.83 | 113.05 | 22.60 | 135.23 |
|                      | H <sub>2</sub> O | 151.72 | 151.72 | 8.08   | 113.73 | 0.70   | 113.04 | -     | 0.70   |
|                      | H <sub>2</sub>   | -      | -      | 24.97  | 30.13  | 30.13  | -      | 22.60 | 7.53   |
|                      | CO               | -      | -      | 79.58  | 7.96   | 7.96   | -      | -     | 7.96   |
|                      | CO <sub>2</sub>  | -      | -      | 4.77   | 117.29 | 117.28 | -      | -     | 117.28 |
|                      | CH <sub>4</sub>  | -      | -      | 0.12   | 0.12   | 0.12   | -      | -     | 0.12   |
|                      | N <sub>2</sub>   | -      | -      | 1.65   | 1.65   | 1.65   | -      | -     | 1.65   |

## References

- 1 V. Wilk and H. Hofbauer, *Fuel*, 2013, **107**, 787–799.
- 2 Recycling Markets, <https://www.recyclingmarkets.net/>, (accessed September 19, 2021).
- 3 J. Rezaian and N. P. Cheremisinoff, in *Gasification Technologies, A Primer for Engineers and Scientists*, CRC Press, 1st edn., 2005.
- 4 Robert A. Meyers, in *Handbook of Petroleum Refining Processes, Third Edition*, McGraw-Hill Education, New York, 3rd ed., 2004.
- 5 ATB | NREL, <https://atb.nrel.gov/>, (accessed May 10, 2022).
- 6 United States, US20100051875A1, 2010.
- 7 S. Boxman and B. F. Staley, *Analysis of MSW Landfill Tipping Fees - 2020*, Environment Research & Education Foundation (2021), 2021.
- 8 A. C. Caputo and P. M. Pelagagge, *Appl. Therm. Eng.*, 2002, **15**.
- 9 S. Afzal, D. Sengupta, A. Sarkar, M. El-Halwagi, and N. Elbashir, *ACS Sustain. Chem. Eng.*, 2018, **6**, 7532–7544.
- 10 M. M. B. Noureldin, N. O. Elbashir and M. M. El-Halwagi, *Ind. Eng. Chem. Res.*, 2014, **53**, 1841–1855.
- 11 R. J. Chang and J. Lacson, *Process Economics Tool - PEP Yearbook*, IHS, 2020.
- 12 A. Frei and R. A. Meyers, in *Handbook of Petrochemicals Production Processes*, McGraw-Hill, 1st edn., 2005, vol. 1, p. 7.3-7.17.
- 13 C. L. Hemler, L. F. Smith and R. A. Meyers, in *Handbook of Petroleum Refining Processes*, McGraw-Hill, 3rd edn., 2004, p. 3.3-3.32.
- 14 G. Lopez, M. Artetxe, M. Amutio, J. Alvarez, J. Bilbao and M. Olazar, *Renew. Sustain. Energy Rev.*, 2018, **82**, 576–596.
- 15 X. Zeng, Y. Ueki, R. Yoshiie, I. Naruse, F. Wang, Z. Han and G. Xu, *Carbon Resour. Convers.*, 2020, **3**, 1–18.
- 16 P. Spath, A. Aden, T. Eggeman, M. Ringer, B. Wallace and J. Jechura, *Biomass to Hydrogen Production Detailed Design and Economics Utilizing the Battelle Columbus Laboratory Indirectly-Heated Gasifier*, NREL, 2005.
- 17 G. Bozzano and F. Manenti, *Prog. Energy Combust. Sci.*, 2016, **56**, 71–105.
- 18 Methanol Plants - Chemical Industry, <https://www.thyssenkrupp-industrial-solutions.com/en/products-and-services/chemical-plants-and-processes/methanol-plants/adwinmethanol>, (accessed January 3, 2022).
- 19 G. Brickner and Inc. Bratton, *Gasification of Non-Recycled Plastics From Municipal Solid Waste In the United States*, GBB Solid Waste Management Consultants, 2013.
- 20 Energy Recovery from Municipal Solid Waste by Thermal Conversion Techn, <https://www.routledge.com/Energy-Recovery-from-Municipal-Solid-Waste-by-Thermal-Conversion-Technologies/Reddy/p/book/9781138612112>, (accessed September 19, 2021).
- 21 US 8,137,655 B2, 2012.
- 22 3729298, 1973.
- 23 LO-CAT® | Sulfur Recovery Solution | Merichem, <https://www.merichem.com/technology/sulfur-recovery-with-lo-cat/>, (accessed December 8, 2021).
- 24 Sunggyu Lee, in *Methanol Synthesis Technology*, CRC Press, Boca Raton, Florida, 1st edn., 1990, p. 33.
- 25 A. Dutta and S. D. Phillips, *Thermochemical Ethanol via Direct Gasification and Mixed Alcohol Synthesis of Lignocellulosic Biomass*, 2009.
- 26 W. A. Amos, *Biological Water-Gas Shift Conversion of Carbon Monoxide to Hydrogen: Milestone Completion Report*, 2004.
- 27 C. Allevi and G. Collodi, in *Integrated Gasification Combined Cycle (IGCC) Technologies*, eds. T. Wang and G. Stiegel, Woodhead Publishing, 2017, pp. 419–443.
